## 1 **Novel Role of UHRF1 in DNA methylation-mediated repression of latent HIV-1**

2  
3 Roxane Verdikt<sup>1,\*</sup>, Sophie Bouchat<sup>1,\*</sup>, Alexander O. Pasternak<sup>2</sup>, Lorena Nestola<sup>1</sup>, Gilles Darcis<sup>3</sup>,  
4 Véronique Avettand-Fenoel<sup>4,5,6,7</sup>, Caroline Vanhulle<sup>1</sup>, Amina Aït-Ammar<sup>1</sup>, Maryam Bendoumou<sup>1</sup>,  
5 Estelle Plant<sup>1</sup>, Valentin Le Douce<sup>8</sup>, Nadège Delacourt<sup>1</sup>, Aurelija Cicilionytė<sup>2</sup>, Coca Necsoi<sup>9</sup>, Francis  
6 Corazza<sup>10</sup>, Caroline Pereira Bittencourt Passaes<sup>11</sup>, Christian Schwartz<sup>12,13</sup>, Martin Bizet<sup>14</sup>, François  
7 Fuks<sup>14</sup>, Asier Sáez-Cirión<sup>11</sup>, Christine Rouzioux<sup>4</sup>, Stéphane De Wit<sup>9</sup>, Ben Berkhout<sup>2</sup>, Virginie Gautier<sup>8</sup>,  
8 Olivier Rohr<sup>11,12,†</sup> and Carine Van Lint<sup>1, †, #</sup>

9  
10 <sup>1</sup> Service of Molecular Virology, Department of Molecular Biology (DBM), Université Libre de  
11 Bruxelles (ULB), 6041 Gosselies, Belgium

12 <sup>2</sup> Amsterdam UMC, University of Amsterdam, Laboratory of Experimental Virology, Department of  
13 Medical Microbiology, 1105 AZ Amsterdam, The Netherlands

14 <sup>3</sup> Infectious Diseases Department, Liège University Hospital, 4000 Liège, Belgium

15 <sup>4</sup> AP-HP, Hôpital Necker-Enfants-Malades, Service de Microbiologie clinique, 75015 Paris, France

16 <sup>5</sup> Université Paris Descartes, Sorbonne Paris Cité, Faculté de Médecine, Paris, France

17 <sup>6</sup> INSERM, U1016, Institut Cochin, Paris, France

18 <sup>7</sup> CNRS, UMR8104, Paris, France

19 <sup>8</sup> Centre for Research in Infectious Diseases, University College Dublin, Dublin 4, Ireland

20 <sup>9</sup> Service des Maladies Infectieuses, CHU St-Pierre, Université Libre de Bruxelles (ULB), 1000  
21 Brussels, Belgium

22 <sup>10</sup> Laboratory of Immunology, IRISLab, CHU Brugmann, Université Libre de Bruxelles (ULB), 1020  
23 Brussels, Belgium

24 <sup>11</sup> Institut Pasteur, Unité HIV, Inflammation et Persistance, Départements de Virologie et Immunologie,  
25 75015 Paris, France

26 <sup>12</sup> Université de Strasbourg, laboratoire DHPI EA7292, Schiltigheim, France

27 <sup>13</sup> IUT Louis Pasteur, Université de Strasbourg, Schiltigheim, France

28 <sup>14</sup> Laboratory of Cancer Epigenetics, Faculty of Medicine, ULB-Cancer Research Center (U-CRC),  
29 Université Libre de Bruxelles (ULB), 1070 Brussels, Belgium

30  
31 <sup>\*,†</sup> These authors contributed equally to this work.

32 <sup>#</sup>Corresponding Author: cvlint@ulb.ac.be

33

34 **ABSTRACT**

35 The multiplicity, heterogeneity and dynamic nature of HIV-1 latency mechanisms are reflected in the  
36 current lack of functional cure for HIV-1 and in the various reported *ex vivo* potencies of latency-  
37 reversing agents. Here, we investigated the molecular mechanisms underlying the potency of the DNA  
38 methylation inhibitor 5-aza-2'-deoxycytidine (5-AzadC) in HIV-1 latency reversal. Doing so, we  
39 uncovered specific demethylation CpG signatures induced by 5-AzadC in the HIV-1 promoter. By  
40 analyzing the binding modalities to these CpG, we revealed the recruitment of the epigenetic integrator  
41 UHRF1 to the HIV-1 promoter. We further demonstrated the role of UHRF1 in DNA methylation-  
42 mediated silencing of the latent HIV-1 promoter. As a proof-of-concept to this molecular  
43 characterization, we showed that pharmacological downregulation of UHRF1 in *ex vivo* HIV<sup>+</sup> patient  
44 cell cultures resulted in potent reactivation of latent HIV-1. Together, we identify UHRF1 as a novel  
45 actor in HIV-1 gene silencing and highlight that it constitutes a new molecular target for HIV-1 curative  
46 strategies.

47

48 **KEYWORDS**

49 HIV-1 latency, DNA methylation, reactivation, UHRF1, EGCG.

50

## 51 INTRODUCTION

52           Combination antiretroviral therapy (cART) is the only therapeutic option available for HIV-  
53 1infected individuals. If cART is efficient in suppressing viral replication and in prolonging the lifespan  
54 of infected individuals, the persistence of transcriptionally-silent proviruses, particularly in latently-  
55 infected resting memory CD4<sup>+</sup> T cells, still prevents HIV-1 eradication (1–3). As such, much effort has  
56 been put in understanding the multiple molecular factors involved in viral latency to develop new anti-  
57 HIV therapeutic strategies. One such strategy relies on the use of latency-reversing agents (LRAs) that  
58 target repressors of HIV-1 gene expression, thereby inducing a controlled activation of latent reservoirs  
59 (4, 5).

60           The multifactorial process of HIV-1 silencing during latency is controlled in part by the viral  
61 transactivator Tat and by cellular transcription factors (TFs) binding sites (TFBS) present in the viral  
62 promoter, located in the 5' long terminal repeat (5'LTR)(6). In addition, epigenetic processes controlling  
63 the chromatin architecture of latent HIV-1 proviruses play key roles in viral transcriptional silencing (7,  
64 8). Two CpG islands (CGIs) present in the 5'LTR region and surrounding the transcription start site  
65 have been reported to be hypermethylated in latently-infected model T-cell lines (Fig. 1A), thus  
66 participating in the 5'LTR heterochromatinization during latency (9–11). Methylation of the HIV-1  
67 promoter in patient cells has been reported in some studies (9, 10, 12) but other reports denied the  
68 implication of 5'LTR methylation *ex vivo* (13–15). To explain these contradictory results, recent studies  
69 proposed that patients clinical characteristics, such as duration of the infection (12) and duration of the  
70 antiretroviral treatment (16, 17), might influence the accumulation of DNA methylation in the 5'LTR.  
71 In agreement with these heterogeneous profiles of DNA methylation on the HIV-1 promoter *ex vivo*, we  
72 have previously shown that latency reversal with the DNA methylation inhibitor 5-aza-2'-deoxycytidine  
73 (5-AzadC or decitabine) is associated with patient-specific qualitative and quantitative variations in  
74 HIV-1 reactivation from latency (18).

75           Here, we studied the molecular basis to 5-AzadC reactivation potency of HIV-1 latency reversal  
76 in terms of proviral DNA demethylation. By highlighting the presence of specific epigenetic signatures  
77 in the HIV-1 promoter following 5-AzadC reactivation, we uncovered the role of the epigenetic  
78 integrator UHRF1 (Ubiquitin-like with PHD and RING finger domain 1) in the control of HIV-1 latency.  
79 As a proof-of-concept, we showed evidence that pharmacological downregulation of UHRF1 constitutes  
80 a novel therapeutic approach for anti-HIV-1 curative strategies.

## 81 RESULTS

### 82 5-AzadC treatment provokes specific demethylation signatures in the HIV-1 5'LTR.

83 We first analyzed how variations in 5-AzadC reactivation potency translated at the DNA  
84 methylation level in the HIV-1 promoter CGIs. To do so, we mock-treated or treated four clones of the  
85 CD4<sup>+</sup> T-lymphoid J-Lat cell line model for HIV-1 latency with 5-AzadC. First, quantification of the  
86 viral progeny particles capsid protein p24<sup>Gag</sup> in the treated culture supernatants by ELISA confirmed the  
87 variation in 5-AzadC reactivation potency *in vitro* (Fig. 1B/D/F/H, , indicating a 10.6 fold, a 2.9 fold, a  
88 2.4 fold and a 12.1 fold reactivation, for J-Lat 6.3, J-Lat 8.4, J-Lat 9.2 and J-Lat 15.4 cells, respectively).  
89 We next assessed the methylation status of the two promoter CGIs termed 5'LTR and NCR CGIs (from  
90 nt -455 to nt 179 and from nt 183 to nt 470, respectively, where nt+1 is at the U3/R junction in the  
91 5'LTR, Fig. 1A) and of a control intragenic CGI located within *rev* termed ETR CGI (nt 7924 to nt  
92 8196, Fig. 1A)(11). Because the two viral LTRs have identical sequences and because we wanted to  
93 specifically obtain the methylation profile of the 5'LTR, both 5'LTR and NCR CGIs were analyzed in  
94 a single amplicon. We confirmed that promoter CGIs were hypermethylated to similar levels in the four  
95 J-Lat clones in mock-treated conditions (Fig. 1C/E/G/I, 92.19%, 92.44%, 89.06% and 91.4% of 5mC,  
96 respectively, for J-Lat 6.3, J-Lat 8.4, J-Lat 9.2 and J-Lat 15.4 cells), consistent with previous  
97 observations (9, 10). Treatment with 5-AzadC provoked a global demethylation in the two promoter  
98 CGIs, though to various extents in each J-Lat clone allowing the following ranking: J-Lat 6.3 cells  
99 (29.17% of 5-AzadC-induced demethylation) > J-Lat 15.4 cells (24.99%) > J-Lat 8.4 cells (19.36%) >  
100 J-Lat 9.2 cells (5.21%) (Fig. 1, respective p-values of 0.0057; 0.0020; 0.0085; 0.0142; unpaired T test).  
101 This ranking was similar to the one we observed with the fold reactivation levels of HIV-1 production,  
102 indicating that 5-AzadC reactivation is dependent on specific demethylation of sites in the HIV-1  
103 promoter but with a heterogeneous profile. As a control, treatment with 5-AzadC did not alter the  
104 methylation profile of the HIV-1 ETR CGI in J-Lat 6.3 cells, J-Lat 8.4 cells and J-Lat 15.4 cells (Fig.  
105 1C/E/I, respectively). Of note and in agreement with lower basal promoter CGIs methylation level, 5-  
106 AzadC reactivation fold in HIV-1 production was the lowest in the J-Lat 9.2 clone (Fig. 1F), in which  
107 the ETR CGI was also demethylated following 5-AzadC treatment, suggesting a non-specific action for  
108 5-AzadC on the HIV-1 promoter in this clone (Fig. 1G).

109 To tease out for specific regulatory mechanisms underlying the heterogeneity of 5-AzadC  
110 reactivation potency, we next mapped the probability of demethylation following 5-AzadC treatment at  
111 individual CpG positions in promoter CGIs. This probabilistic analysis highlighted that some CpGs were  
112 more prone to 5-AzadC-induced demethylation (Fig. S1 and Methods section). The most statistically  
113 significant 5-AzadC-induced differentially-demethylated positions (termed "DDMPs") are listed in  
114 Table 1. Despite some similarities, the position of statistically significant DDMPs varied among J-Lat  
115 clones, illustrating the heterogeneity of the 5-AzadC-induced mechanisms of HIV-1 reactivation from  
116 latency recapitulated by the clones. Some DDMPs were present in sequences giving rise to viral RNA  
117 features (PBS or the packaging sequence signal  $\psi$ ), suggesting a potential link between DNA

118 methylation deposition and RNA structuration (Table 1). Importantly, several DDMPs were located  
119 within TFBS involved in HIV-1 transcriptional regulation, in the cAMP-Responsive Element  
120 (CRE)(19), NF- $\kappa$ B binding sites (19), Sp1 binding sites (20, 21), and interferon-stimulated response  
121 element (21) (highlighted in Figure 1A and Table 1).

### 122 **Methylation of HIV-1 DDMP5 allows the recruitment of UHRF1.**

123 We next focused on the DDMP identified in J-Lat 8.4 cells and located at nucleotide positions  
124 -120 to -119 in the HIV-1 promoter, referred to as DDMP5 hereafter (Table 1, Figure 1). Indeed,  
125 DDMP5 presented the highest demethylation probability and was the most statistically significant  
126 among all identified DDMPs within TFBS in all clones (Table 1, 5-AzadC-induced demethylation  
127 probability=0.64 and p-value=0.005, Fisher's exact test). DDMP5 is located within a known HIV-1  
128 promoter CRE (19). Since genome-wide studies have shown that DNA methylation generally affects  
129 negatively the binding of CRE factors to their cognate sites (22), we hypothesized that DDMP5  
130 methylation would prevent the binding of cognate transcriptional activators to the HIV-1 promoter CRE.

131 We thus performed electrophoretic mobility shift assays (EMSAs) using radiolabeled double-  
132 stranded oligonucleotide probes containing the HIV-1<sub>NL4.3</sub> DDMP5 sequence in an unmethylated  
133 ("DDMP5") or in a methylated ("DDMP5-me") form. These assays showed that the unmethylated  
134 DDMP5 probe was bound by a single retarded DNA-protein complex, termed C1 (Fig. 2A). In supershift  
135 experiments, addition of antibodies raised against CREB and CREM provoked a decreased in the  
136 complex C1 formation (Fig. 2A, lane 4 and lane 5, indicated by an asterisk), whereas addition of the  
137 IgG control or of antibodies raised against ATF1 did not affect complex formation (Fig. 2A, lane 3 and  
138 lane 6, respectively), demonstrating that the C1 complex contains both CREB and CREM proteins.  
139 Furthermore, the C1 complex was still observed when the DDMP5 probe was methylated (Fig. 2A, lane  
140 8) and supershift experiments showed that CREB and CREM factors could bind to the same extent to  
141 the methylated and unmethylated probes (Fig. 2A, lane 10 and lane 11, respectively). We further  
142 confirmed that the binding of proteins in the C1 complex was independent of the DDMP5 methylation  
143 status, since molar excesses of both methylated and unmethylated DDMP5 competed out complex C1  
144 formation (Fig. S2A, compare lanes 3-5 with lanes 11-13 and Fig. S2B). Together, these data indicate  
145 that DNA methylation in the HIV-1 promoter CRE site neither prevented nor decreased the binding of  
146 its cognate factors. The discrepancy between our results and the reported genome-wide DNA  
147 methylation-induced inhibition of CRE factors binding (22) could be explained by sequence differences  
148 in this TFBS motif (Fig. 2A).

149 Interestingly, we observed by EMSAs the formation of an additional retarded complex, termed  
150 C2, with the methylated HIV-1 DDMP5 probe (Fig. 2A, lanes 8 to 12). We found that the C2 complex  
151 was formed only when the DDMP5 probe was methylated and was competed out only by methylated  
152 DDMP5 oligonucleotides (Fig. S2A, lanes 7-9). Furthermore, formation of the C2 complex was not  
153 competed out by molar excesses of the methylated consensus for methyl-binding domain (MBD)  
154 proteins, or of the methylated consensus for Sp1, indicating that the proteins contained within the C2

155 complex were specific to the methylated HIV-1 DDMP5, and not to any 5mC-containing sequence (Fig.  
156 S2C). Because our *in vitro* experiments showed that, rather than preventing the binding of transcriptional  
157 activators, DDMP5 methylation allowed the binding of methylCpG-recognizing proteins to the HIV-1  
158 promoter, we investigated the nature of the proteins present in the C2 complex. To do so, we performed  
159 additional supershift experiments, using antibodies raised against proteins known to bind  
160 methylcytosines (MBD2, MBD4, MeCP2, Kaiso, UHRF1 and RBP-JK)(23, 24). Addition of an  
161 antibody raised against UHRF1, but not against the other proteins, altered the formation of the C2  
162 complex, concomitantly with the appearance of a supershifted complex of lower mobility (Fig. 2B, lane  
163 9, indicated with an asterisk), while addition of IgG did not affect complex C2 formation (Fig. 2B, lane  
164 5). These results thus indicated that the C2 complex contained UHRF1 that bound *in vitro* to the  
165 methylated HIV-1 DDMP5.

166 To demonstrate *in vivo*, within the context of chromatin, the relevance of UHRF1 binding to the  
167 HIV-1 promoter, we performed chromatin immunoprecipitation (ChIP) assays in J-Lat 8.4 cells. Using  
168 primers hybridizing specifically to the HIV-1 5'LTR, in the Nuc-1 region, we showed that UHRF1 was  
169 recruited to the latent promoter in J-Lat 8.4 cells (Fig. 2C, 20.75-fold recruitment). Furthermore, 5-  
170 AzadC-induced demethylation, allowing DNA demethylation of DDMP5 (Fig. 1E), was accompanied  
171 by a statistically significant decrease in UHRF1 recruitment to the viral promoter (Fig. 2C, 22.9-fold  
172 decrease,  $p=0.01$ , unpaired T test). As a control, we quantified *UHRF1* mRNA and protein levels in J-  
173 Lat 8.4 cells in response to 5-AzadC (Fig. S3A and Fig. S3B, respectively), and showed that 5-AzadC  
174 did not alter UHRF1 expression, thus demonstrating a direct link between UHRF1 decreased recruitment  
175 to the HIV-1 promoter and its 5-AzadC-induced demethylation. Despite the fact that DDMP5 had been  
176 identified in the J-Lat 8.4 clone, we next assessed whether UHRF1 *in vivo* recruitment to the HIV-1  
177 5'LTR was a common feature of HIV-1 latency. These additional ChIP experiments showed that  
178 UHRF1 was also recruited to the latent viral promoter in the J-Lat 6.3 and J-Lat 15.4 cells, albeit to  
179 lower levels than in the J-Lat 8.4 cells (Fig. 2D, 5.35-fold and 3.75-fold recruitment, respectively). To  
180 determine how UHRF1 recruitment modalities correlated to DDMP5 methylation status in the 5'LTR,  
181 we plotted UHRF1 fold recruitment from our ChIP results to DDMP5 methylation level in latent  
182 conditions in all four J-Lat clones. This showed that UHRF1 *in vivo* recruitment followed the status of  
183 the DDMP5 methylation status in the four clones analyzed, with a trend towards higher recruitment of  
184 UHRF1 to more methylated DDMP5 (Fig. 2E). For instance, J-Lat 9.2 cells, in which DDMP5 was  
185 already largely unmethylated in basal conditions (Fig. 1G, 9 clones unmethylated on 12) showed weak  
186 *in vivo* UHRF1 recruitment to the HIV-1 promoter (Fig. 2E). Of note, the lack of significant correlation  
187 between UHRF1 *in vivo* recruitment and the DDMP5 methylation status in the 5'LTR can be explained  
188 by its independent recruitment to the viral promoter through other epigenetic marks, thanks to UHRF1  
189 domains for histone methylation or acetylation (25, 26), through interaction with other epigenetic  
190 enzymes (27, 28) or through direct recognition of binding motifs in the 5'LTR (29).



191 Taken together, our results demonstrated that the 5'LTR DDMP5 position corresponds to an *in*  
192 *vitro* binding site for UHRF1. We confirmed the *in vivo* recruitment of UHRF1 to the latent HIV-1  
193 5'LTR and showed it is proportional to the methylation level of a single CpG residue. Furthermore,  
194 reactivation of HIV-1 gene expression following 5-AzaC treatment was accompanied by the  
195 demethylation of DDMP5 and by a decreased UHRF1 recruitment to the viral promoter, suggesting a  
196 role for UHRF1 in DNA methylation-mediated silencing of HIV-1 gene expression.

#### 197 **UHRF1 transcriptional repression of the HIV-1 promoter is DNA methylation-dependent.**

198 To determine the involvement of UHRF1 in the maintenance or establishment of transcriptional  
199 silencing at the HIV-1 promoter during latency, we induced the downregulation of endogenous UHRF1  
200 by shRNAs. J-Lat 8.4 cells were mock-transduced, or stably transduced with lentiviral vectors  
201 expressing the puromycin-resistance gene and containing one out of four different shRNAs targeting  
202 UHRF1 mRNA (shUHRF1#1-4) or a control non-targeting shRNA (shNT). UHRF1 knockdown in  
203 selected puromycin-resistant clones was confirmed both by western blot analyses and by RT-qPCR (Fig.  
204 S4A and S4B, respectively). Because UHRF1 is essential in the cell cycle control and its downregulation  
205 is associated with cellular mortality (30, 31), we selected for further analyses one shUHRF1 that did not  
206 provoke the most efficient downregulation of UHRF1 but that would, therefore, not be counter-selected  
207 (Fig. S4, pLV shUHRF1#4). First, by ChIP experiments, we showed that RNAPII recruitment to the  
208 Nuc-1 region of the HIV-1 promoter was statistically higher in UHRF1-depleted J-Lat 8.4 cells than in  
209 shNT-transduced cells, consistent with a release of viral transcriptional blocks from latency (Fig. 3A,  
210 2.48-fold increase,  $p=0.008$ , unpaired T test). Reactivation of HIV-1 gene expression from latency in J-  
211 Lat 8.4 cells following UHRF1 knockdown was further studied by quantifying by RT-qPCR initiated  
212 (TAR region) and elongated (*tat* region) HIV-1 transcripts (Fig. 3B). A statistically higher number of  
213 initiated and elongated transcripts was observed when UHRF1 was knocked down in J-Lat 8.4 cells,  
214 compared to the amount measured in shNT-transduced cells (Fig. 3B, 3.29-fold increase,  $p=0.0011$  and  
215 1.7-fold,  $p=0.034$ , for TAR and *tat*, respectively, unpaired T test). This indicates that the observed  
216 increase in RNAPII recruitment was accompanied by an increased transcription initiation and elongation  
217 from the HIV-1 promoter. In addition, we observed a statistically significant increase in multiply spliced  
218 (MS) HIV-1 RNA (32) in shUHRF1-transduced cells compared to shNT-transduced cells (Fig. 3B, 2.99-  
219 fold increase,  $p=0.0004$ , unpaired T test). Finally, quantification of p24<sup>Gag</sup> capsid protein by ELISA in  
220 culture supernatants from puromycin-resistant clones showed that UHRF1 knockdown was  
221 accompanied by a higher HIV-1 production than the one observed in the shNT-transduced cells (Fig.  
222 3C, 4.5-fold increase,  $p=0.02$ , unpaired T test). We observed this statistically significant increase in  
223 HIV-1 production upon UHRF1 depletion with the four shUHRF1 we used (Fig. S4C), strengthening  
224 the specific role of UHRF1 in HIV-1 silencing. Of note, J-Lat 8.4 cells transduction with the control,  
225 non-targeting shRNA, also caused reactivation of HIV-1 gene expression and production, though to  
226 lower levels than transduction of the shUHRF1, as seen by increased HIV-1 initiating, *gag* and multiply  
227 spliced transcripts (Fig. 3B) and increased HIV-1 production (Fig. 3C and Fig. S4C). This was consistent

228 with the use of lentiviral shRNA vectors and was in agreement with a previous report (33). Nevertheless,  
229 we observed the reactivation of HIV-1 gene expression and production when shUHRF1-transduced  
230 conditions were normalized to shNT-transduced conditions, and *a fortiori*, when normalized to mock-  
231 transduced conditions (Fig. 3A-C). Together, these data demonstrated that UHRF1 knockdown enables  
232 a full release (i.e. up to the completion of the replication cycle and the production of progeny particles)  
233 of the transcriptional blocks from latency in J-Lat 8.4 cells, thereby indicating a role for UHRF1 in the  
234 maintenance of HIV-1 latency.

235 Because UHRF1 is an important epigenetic integrator in the heterochromatinization of *cis*-  
236 regulatory sequences (25, 34, 35), we next further investigated how UHRF1 knockdown and subsequent  
237 reactivation of HIV-1 gene expression translated in terms of DNA methylation modifications on the  
238 HIV-1 promoter. UHRF1 knockdown was associated with a statistically significant decrease in global  
239 HIV-1 promoter DNA methylation compared to mock-transduced conditions (Fig. 3D), whereas no  
240 DNA demethylation was observed on the control ETR CGI. These results thus indicate that UHRF1  
241 depletion leads to HIV-1 transcriptional reactivation through specific 5'LTR demethylation. Of note,  
242 the demethylation signatures in the HIV-1 promoter CGIs in response to UHRF1 depletion were similar  
243 than those in 5-AzadC-treated cells (compare Fig. 3D and Fig. 1E). Indeed, the fifth CpG dinucleotide  
244 in the 5'LTR CGI showed a high demethylation probability in response to UHRF1 knockdown (Fig.  
245 S4), linking mechanistically UHRF1 with 5-AzadC-induced reactivation in J-Lat 8.4 cells. In addition,  
246 shNT transduction that provoked HIV-1 reactivation was also accompanied by global 5'LTR  
247 demethylation and by demethylation of DDMP5, further highlighting that the DDMP5 methylation state  
248 is functionally linked to the level of HIV-1 gene silencing (Fig. 3D). UHRF1 has been showed to interact  
249 with multiple epigenetic enzymes, including DNMT1 (30, 36) and G9a/EHMT2 (27, 28), that are  
250 important actors in the HIV-1 promoter heterochromatinization during latency (reviewed in (8)). We  
251 thus determined the effect of UHRF1 downregulation on the *in vivo* recruitment of DNMT1 and  
252 G9a/EHMT2 to the viral promoter. Following depletion of UHRF1 and reactivation of HIV-1 gene  
253 expression and production from latency, a significant decrease in DNMT1 and in G9a/EHMT2 was  
254 observed on the viral promoter (Fig. 3E, 3.61-fold decrease,  $p=0.0003$  and 12.71-fold decrease,  
255  $p=0.00005$ , unpaired T test, for DNMT1 and G9a, respectively). These results thus indicate that UHRF1  
256 silences HIV-1 gene expression during latency by actively promoting the accumulation of DNA  
257 methylation on the viral promoter *via* its recruitment of DNMT1. Furthermore, we demonstrate that  
258 UHRF1 also recruits G9a/EHMT2 to the latent promoter, thereby linking DNA methylation with the  
259 accumulation of repressive histone methylation.

260 UHRF1 possesses multiple repression mechanisms of gene expression and our data suggest that  
261 it can be recruited to the 5'LTR independently of DDMP5 methylation. We thus further dissected the  
262 dependency of UHRF1 to DNA methylation and in particular, to the methylation status of DDMP5 for  
263 its role in HIV-1 transcriptional repression. To do so, we subcloned the HIV-1 5'LTR region in a reporter  
264 construct, where the LTR controls the firefly luciferase gene and is either unmethylated (referred as to



265 the “pLTR-FLuc” vector), in a hypermethylated state (i.e. where each CpG of the 5’LTR has been  
266 artificially methylated, the resulting construct being termed “pLTRme-Fluc”), or where only the 5<sup>th</sup> CpG  
267 dinucleotide corresponding to the DDMP5 of the LTR is methylated (referred as to the  
268 “pLTR(CpG5me)-Fluc” vector). First, these three reporter vectors were transiently transfected in  
269 HEK293T cells along with the control non-targeting shRNA vector (referred as to the “pshNT”). These  
270 transfections showed that the pLTRme-Fluc vector presented a statistically significant decreased  
271 luciferase activity in comparison to the pLTR-Fluc vector (Fig. 3F, 4.72-fold decrease,  $p < 0.0001$ ,  
272 unpaired T test), confirming that methylation of the LTR provoked a decrease of its promoter activity.  
273 Interestingly, methylation of the DDMP5 position alone was sufficient to reduce the LTR promoter  
274 activity in a statistically relevant manner (Fig. 3F, 1.78-fold decrease,  $p = 0.0003$ , unpaired T test), albeit  
275 not as much as with the fully-methylated LTR (Fig. 3F, 2.64-fold increase,  $p = 0.0003$ , unpaired T test).  
276 These data confirmed the importance of DDMP5 methylation in recapitulating DNA methylation-  
277 mediated repression on the HIV-1 promoter. Second, we transiently co-transfected the reporter LTR  
278 constructs along with the UHRF1-targeting shRNA vector (“pshUHRF1”). Downregulation of  
279 endogenous UHRF1 in HEK293T cells was confirmed by western blot (Fig. 3G) and was associated  
280 with statistically significant increased luciferase activities for all three constructs (Fig. 3F, 10.77-fold  
281 increase,  $p < 0.0001$  ; 1.83-fold increase,  $p = 0.0014$  and 4.71-fold increase,  $p = 0.0152$ , for the pLTR-Fluc,  
282 pLTRme-Fluc and pLTR(CpG5me)-Fluc constructs, respectively and according to an unpaired T test),  
283 confirming the repressive role of UHRF1 in the control of HIV-1 gene expression. Interestingly, in this  
284 reporter system, UHRF1-mediated repression of the HIV-1 promoter activity was proportionally lower  
285 when the LTR was totally methylated or methylated on the DDMP5 in comparison to the repression  
286 observed when the LTR was unmethylated (Fig. 3F, compare the 1.83-fold and 4.71-fold increases with  
287 the 10.77-fold increase, for the fully-methylated, DDMP5-methylated and unmethylated LTRs,  
288 respectively). These results indicated that UHRF1 repressive activity was dependent on the HIV-1  
289 promoter DNA methylation status, and in particular, that this repression was partially, but not totally,  
290 dependent on the DDMP5 methylation status. To confirm the dependency of UHRF1 on DNA  
291 methylation for its role in HIV-1 transcriptional repression, we performed a rescue experiment in which  
292 we transiently co-transfected reporter constructs along with the UHRF1-targeting shRNA vector then,  
293 after twenty-four hours, we added an UHRF1 expression vector (“pUHRF1”) before assaying the  
294 luciferase activities after another twenty-four hours. Overexpression of UHRF1 was confirmed by  
295 western blot (Fig. 3G) and decreased the luciferase activities of all three reporter vectors in comparison  
296 to the conditions of UHRF1 downregulation (Fig. 3F, 3.88-fold decrease,  $p < 0.0001$  ; 1.80-fold decrease  
297  $p = 0.0217$  and 6.09-fold decrease,  $p = 0.0114$  for the pLTR-Fluc, pLTRme-Fluc and pLTR(CpG5me)-  
298 Fluc constructs, respectively), thereby confirming the specific role of UHRF1 in the repression of HIV-  
299 1 promoter activity. In particular, this effect was proportionally more important for the DDMP5-  
300 methylated construct, then for the fully-methylated construct, in comparison to the unmethylated LTR  
301 construct (Fig. 3F, compare the 6.09-fold and 1.80 -fold to the 3.89-fold, for the DDMP5-methylated,

302 fully-methylated and unmethylated LTRs, respectively). Together, these results indicated that in the  
303 context of an *in vitro* HIV-1 5'LTR reporter system, UHRF1 repression of viral transcription depended  
304 in part but not exclusively on DNA methylation of the viral promoter. Importantly, our system allowed  
305 to specifically dissect the contribution of the single DDMP5 methylation status, showing its role in the  
306 repression of HIV-1 promoter activity.

307 Altogether, our results demonstrated the DNA methylation-mediated role of UHRF1 in the HIV-  
308 1 promoter silencing during latency.

### 309 **Pharmacological downregulation of UHRF1 by EGCG promotes HIV-1 reactivation from latency.**

310 Understanding the molecular mechanisms of HIV-1 latency has allowed the development of  
311 several classes of LRAs (5). Our results on UHRF1 positioned this cellular factor as an attractive  
312 pharmacological target for HIV-1 latency reversal strategies. Epigallocatechin-3-gallate (EGCG), the  
313 major polyphenolic compound of green tea, has been shown to downregulate UHRF1 expression (37).  
314 Accordingly, we showed that increasing concentrations of EGCG steadily decreased UHRF1 protein  
315 levels starting from 30µg/mL of EGCG in J-Lat 8.4 cells (Fig. S5A). This protein level decrease was  
316 not accompanied by a decrease in *UHRF1* mRNA level, as quantified by RT-qPCR (Fig. S5B),  
317 consistent with a previous report showing that EGCG targets UHRF1 proteins but not *UHRF1*  
318 transcripts (37).

319 To assess the LRA potential of EGCG *in vitro*, we quantified HIV-1 transcripts by RT-qPCR in  
320 treated J-Lat 8.4 cells (Fig. 4A). We observed statistically significant increases in initiated (TAR region),  
321 elongated (*gag* and *tat* regions), and MS HIV-1 transcript levels in EGCG-treated compared to mock-  
322 treated conditions (Fig. 4A, 5.70-fold and  $p=0.03$ , 3.35-fold and  $p=0.003$ , 2.15-fold and  $p=0.003$ , and  
323 3.11-fold increase and  $p=0.01$  for TAR, *tat*, *gag* and MS RNA, respectively at 70µg/mL of EGCG).  
324 Furthermore, quantification of GFP<sup>+</sup> cells by flow cytometry showed that starting from 10µg/mL of  
325 EGCG, a release of the post-transcriptional blocks to the production of HIV-1 was observed (Fig. 4B).  
326 In addition, the cellular metabolic activity in J-Lat 8.4 cells after treatment with increasing EGCG doses  
327 was decreased in a statistically relevant manner, with a metabolic activity of 36% observed at the highest  
328 EGCG dose (Fig. 4C). Despite increased levels of *gag* transcripts (Fig. 4A), EGCG did not reactivate  
329 HIV-1 protein production in J-Lat 8.4 cells, as measured by p24<sup>Gag</sup> capsid protein ELISA in cell  
330 supernatants (Fig. S5C). These data were consistent with a previous report indicating that EGCG  
331 destabilizes HIV-1 particles by binding to envelope phospholipids, thereby inducing their deformation  
332 (38).

333 Since EGCG is a broad-acting compound (39), we next investigated EGCG modes of action in  
334 HIV-1 latency reversal, specifically, their dependency on UHRF1 downregulation. First, we performed  
335 EGCG reactivation assays in latently-infected J-Lat 8.4 cells in which UHRF1 expression had been  
336 downregulated. By normalizing each EGCG treatment to its respective mock control, we observed a  
337 statistically-significant decrease in EGCG reactivation potency in shUHRF1-transduced versus mock-  
338 transduced cells (Fig. 4D, 6.34-fold decrease,  $p=0.0032$ , unpaired T test), whereas UHRF1 expression

339 was further downregulated in EGCG-treated shUHRF1-transduced cells in comparison to mock-treated,  
340 mock-transduced cells (Fig. 4E and Fig. 4F). Second, we assessed the DNA methylation signatures  
341 occurring at genome-scale while knocking down UHRF1 or treating latently-infected cells with EGCG  
342 and compared them. To do so, we performed an Infinium Human Methylation 850K array (40). By using  
343 unsupervised analyses, such as hierarchical clustering and principal component analyses, we revealed a  
344 strong effect of both EGCG treatment and UHRF1 knockdown on the cellular methylome, with treated  
345 samples being distinctly different from control samples (Fig. S6A and Fig. S6B). In addition, EGCG  
346 treatment and UHRF1 knockdown methylation profiles partially clustered together, suggesting that the  
347 effect of the two conditions on the DNA methylome is only partly similar. We identified 3664  
348 hypomethylated CpGs through UHRF1 knockdown and 34614 hypomethylated CpGs through EGCG  
349 treatment (Fig. 4G and Fig. 4H, respectively). As already suggested by the unsupervised analyses, the  
350 overlap between differential CpGs through EGCG treatment and UHRF1 knockdown, while small, was  
351 statistically significant (Fig. 4I, 601 sites, hypergeometrical p-value < 1e-170), suggesting that some but  
352 not all mechanisms involved in the two processes were similar. We further assessed which pathways  
353 were affected at the DNA methylation level in EGCG-treated and shUHRF1-transduced conditions  
354 using a Gene Set Enrichment Analysis (GSEA)(41). This analysis further confirmed the partial but not  
355 total overlap between the two conditions (Fig. S6C and S6D).

356 Together, these experiments indicated that EGCG reactivates HIV-1 from latency in part *via* the  
357 downregulation of UHRF1, although, this compound has a broader reactivation capacity on HIV-1 gene  
358 expression, in line with its pleiotropic action on the HIV-1 replication cycle (38, 42).

### 359 **EGCG induces HIV-1 expression in CD8<sup>+</sup>-depleted PBMCs from HIV-1<sup>+</sup> aviremic individuals.**

360 The development of LRAs has been guided by deciphering HIV-1 latency molecular mechanisms  
361 in *in vitro* cell models (5). However, these models do not completely recapitulate the biological  
362 properties of *in vivo* latent reservoirs (43). Therefore, we next evaluated the LRA potency of EGCG *ex*  
363 *vivo*, using cultures of CD8<sup>+</sup>-depleted PBMCs isolated from blood of cART-treated aviremic HIV-1<sup>+</sup>  
364 individuals.

365 We first assessed cellular viability and metabolic activity in *ex vivo* cultures of CD8<sup>+</sup>-depleted  
366 PBMCs from six healthy donors in response to EGCG treatments (Fig. S7). Neither TCR stimulation,  
367 serving as a positive control, nor increasing EGCG doses affected cellular viability (Fig. S7A). However,  
368 consistent with our observations in J-Lat cells, metabolic activity was affected by EGCG, although the  
369 median of metabolic activity remained tolerable (Fig. S7B). Suitable LRA candidates for anti-HIV-1  
370 latency strategies *in vivo* should limit non-specific or strong immune T-cell activation. Therefore, we  
371 assessed the level of cell surface activation markers HLA-DR (late activation marker), CD25  
372 (intermediate activation marker), CD69 (early activation marker) and CD38 (late activation marker and  
373 predictor of HIV-1 progression) in comparison to the mock-treated condition (Fig. S7C-F). TCR  
374 stimulation consistently and statistically increased the levels of each marker, while EGCG treatment  
375 increased slightly but statistically the surface expression of CD69 (Fig. S7E). Because this increase in

376 CD69 expression was not associated with later cell activation when EGCG stimulation was sustained  
377 for 6 days (data not shown), we attributed it to an indirect epigenetic effect of EGCG (44). Flow  
378 cytometry analyses also highlighted that increasing doses of EGCG were associated with a statistically  
379 significant decrease in CD4 expression on the treated CD8<sup>+</sup>-depleted PBMCs (Fig. S7G), which would,  
380 in the context of HIV-1 infection, reduce the number of target cells and therefore limit HIV-1  
381 dissemination.

382 Based on these observations of tolerable cytotoxic, metabolic and immune effects, we next  
383 investigated HIV-1 recovery in CD8<sup>+</sup>-depleted PBMCs in response to EGCG treatments. To do so, we  
384 purified CD8<sup>+</sup>-depleted PBMCs from 22 HIV<sup>+</sup> aviremic cART-treated individuals (Table S1A) and  
385 evaluated the frequency of infected cells during plating by quantification of cell-associated total HIV-1  
386 DNA (Table S1B). *Ex vivo* cultures were then mock-treated, treated with 50µg/mL or 70µg/mL of  
387 EGCG or activated with anti-CD3 + anti-CD28 antibodies as a positive control. Because of EGCG effect  
388 in degrading viral particles, reactivation of HIV-1 gene expression was measured unequivocally by the  
389 quantification of intracellular HIV-1 RNA. These quantifications showed that EGCG potently increased  
390 HIV-1 unspliced RNA levels in patient cells, even to higher levels than TCR activation (Fig. 5A).  
391 Moreover, HIV-1 US RNA/DNA ratios were statistically increased in EGCG-treated conditions (Fig.  
392 S8A and S8C), indicating that proviruses were more transcriptionally active. Quantification of HIV-1  
393 extracellular RNA in supernatants, serving as a surrogate for the completion of the viral replication  
394 cycle, further indicated a statistically significant increase in HIV-1 extracellular RNA when CD8<sup>+</sup>-  
395 depleted PBMCs from HIV<sup>+</sup> individuals were submitted to EGCG treatments (Fig. 5B). Thus our result  
396 show that, by destabilizing HIV-1 particles in reactivated cell cultures (38), EGCG treatment released  
397 HIV-1 RNA from virions *ex vivo*. Accordingly, we observed a statistically-significant increase in HIV-  
398 1 extracellular RNA/DNA ratios in EGCG-treated compared to mock-treated *ex vivo* patient cell cultures  
399 (Fig. S8B and S8C), indicating that not only transcriptional but also post-transcriptional latency blocks  
400 were overcome by EGCG treatment. Altogether, our results highlight the strong potency of EGCG as a  
401 new LRA *ex vivo* allowing to reactivate HIV-1 transcription to the completion of the replication cycle,  
402 while maintaining low immune activation level, and even allowing to prevent *de novo* infections by  
403 decreasing cell surface CD4 marker expression and by degrading reactivated HIV-1 particles.

404 Finally, because our *in vitro* data pointed to the pleiotropic action of EGCG in its HIV-1  
405 reactivation capacity, we further assessed the contribution of HIV-1 promoter methylation *ex vivo* to  
406 EGCG reactivation potency. A dynamical increase in the degree of viral promoter methylation has been  
407 shown in HIV<sup>+</sup> individuals in response to the duration of the antiretroviral treatment or the time of viral  
408 suppression (16, 17). Accordingly, strong statistically significant positive correlations were observed  
409 between the EGCG-mediated HIV-1 reactivation potency and either time on cART (Fig. S9A) or time  
410 of virological suppression (Fig. S9B), while no correlation was observed for the positive control (Fig.  
411 S9C). These results demonstrate that EGCG modes of action *ex vivo* are time-dependent in HIV<sup>+</sup>  
412 individuals, suggesting that EGCG acts, at least in part, through HIV-1 promoter demethylation. To

413 refine this observation, we next assessed the DNA methylation level of the viral promoter in our cohort  
414 of HIV<sup>+</sup> individuals by sodium bisulfite sequencing. As suggested by Blazkova and colleagues (10), we  
415 found that the assessment of DNA methylation in aviremic individuals, who have smaller reservoirs that  
416 prevent the analysis of proviral DNA, was technically challenging. Nevertheless, we obtained the DNA  
417 methylation profile of the HIV-1 promoter for 8 out of the 22 enrolled HIV<sup>+</sup> individuals. Out of these,  
418 five individuals had no detectable DNA methylation, while three individuals presented a median  
419 methylation level of 7.41% mCpG on the HIV-1 promoter, which corresponds to levels reported in other  
420 studies (10, 12, 17). To determine the relationship between EGCG reactivation potency and *in vivo* HIV-  
421 1 promoter methylation, we clustered these 8 individuals in groups of non-methylated or methylated  
422 5'LTR and plotted the cell-associated HIV-1 US RNA for 50µg/mL of EGCG (Figure S9D). Without  
423 reaching statistical significance, a trend towards a higher reactivation could be observed for patients  
424 accumulating more DNA methylation on the viral promoter. The lack of statistical significance can be  
425 attributed to the low number of patients but it also reveals the pleiotropic reactivation capacity of EGCG.  
426 We propose that the mechanism of EGCG reactivation of HIV-1 from latency is through DNA  
427 demethylation of the viral promoter, or, when it is not methylated, through indirect demethylation of  
428 cellular genes.

429 Altogether, our *ex vivo* data indicate, in line with the heterogeneity of the mechanisms responsible  
430 for HIV-1 latency, that EGCG, in addition to its antiviral properties, is a heterogeneous LRA, capable  
431 of reversing HIV-1 latency through several modes of actions depending on different infected  
432 individuals.

433

## 434 **DISCUSSION**

435 Accumulating data highlights the intrinsically dynamic and heterogeneous nature of latent HIV-  
436 1 cellular reservoirs within and between infected individuals. This heterogeneity and the multiplicity of  
437 the silencing mechanisms underlying HIV-1 latency rather than latency in itself are now considered as  
438 the major barrier to eradicating HIV-1 (8). In agreement, LRAs have been found to present various  
439 reactivation potencies *in vitro* and *ex vivo* (45–47). In the context of DNA methylation, our previous  
440 study has highlighted that the DNA methylation inhibitor 5-AzadC exhibits different *ex vivo* reactivation  
441 potencies in terms of HIV-1 latency reversal (18). Here, we investigated the molecular source of this  
442 potency heterogeneity at the level of proviral DNA methylation.

443 We first evidenced the existence of non-random and reproducible DNA methylation signatures in  
444 response to 5-AzadC treatment at the level of the single CpG dinucleotide in the HIV-1 promoter. Thus,  
445 rather than reactivating HIV-1 in a non-specific manner, 5-AzadC acts through specific molecular  
446 mechanisms within the viral promoter. To tease out for these regulatory mechanisms, we mapped  
447 preferentially-demethylated positions in the 5'LTR. In the present study, we focused on the most  
448 significantly-demethylated CpG position of our whole dataset but a similar approach can be used for  
449 other positions or for other epigenetic LRAs. DDMP5 is located in a CRE, however, rather than showing



450 that DDMP5 methylation prevents the binding of cognate transcriptional activators (22, 48), we  
451 demonstrated that DDMP5 methylation allowed the *in vitro* binding of an additional protein complex,  
452 containing UHRF1. We also reported *in vivo* recruitment of UHRF1 to the latent HIV-1 promoter.  
453 Interestingly, we showed that UHRF1 recruitment to the latent promoter was only proportional to the  
454 level of DDMP5 methylation, indicating that UHRF1 could be recruited redundantly to the latent  
455 promoter through other mechanisms than DNA methylation. This redundancy is a general trend in the  
456 recruitment of epigenetic machineries to the HIV-1 5'LTR and safeguarding their recruitment points  
457 towards the importance of the epigenetic repression of viral genes during latency (8). UHRF1, in  
458 particular, is an important epigenetic integrator as it both reads the chromatin (5mC, H3K9me3 and  
459 H3R2) and recruits epigenetic enzymes (DNMT1, G9a/EHMT2, ...). We thus investigated the role of  
460 the recruited UHRF1 in participating in the 5'LTR heterochromatinization during HIV-1 latency. We  
461 report here for the first time a role for UHRF1 in HIV-1 silencing through DNA methylation.  
462 Mechanistically, UHRF1 knockdown led to a statistically significant decrease in the global DNA  
463 methylation level of the 5'LTR and of DNMT1 recruitment. We also showed that G9a/EHMT2  
464 recruitment to the 5'LTR was decreased upon UHRF1 knockdown, supporting the model that UHRF1  
465 branches several repressive epigenetic mechanisms during HIV-1 latency. Considering the multiple  
466 modes of gene repression mediated by UHRF1, we further sought to determine how much of its  
467 repressive action on the 5'LTR was dependent on DNA methylation, and in particular on the methylation  
468 status of DDMP5. To answer unambiguously to this question, we decided to work in an artificial system  
469 of transient transfection and showed that, even there, UHRF1 repression of HIV-1 transcription  
470 depended strongly on DNA methylation and, in a large part, on DDMP5. Thus, in agreement with its  
471 potential multiple recruitment modes to the viral promoter, UHRF1 represses HIV-1 gene expression  
472 during latency through several mechanisms, but predominantly, through DNA methylation. Together,  
473 these results demonstrate that UHRF1 is a new actor in HIV-1 latency.

474 As a proof-of-concept that the molecular characterization of HIV-1 latency leads to the  
475 identification of new targets for therapeutic strategies, we next studied the latency-reversing potency of  
476 UHRF1 downregulation. EGCG, the major phenolic compound of green tea, has been reported, among  
477 other functions, to affect UHRF1 expression (49). Using complementary models – latently-infected J-  
478 Lat T-cell lines and *ex vivo* cell cultures from cART-treated HIV<sup>+</sup> aviremic individuals – our results  
479 showed the potency of EGCG as a new LRA. Indeed, EGCG reactivated HIV-1 from latency up to the  
480 completion of the viral replication cycle, in a short time frame, and in all the latency models we tested.  
481 Interestingly, EGCG had been reported to present an antiviral activity on HIV-1, by inhibiting several  
482 steps of its replication cycle, notably, by binding and destabilizing the HIV-1 envelope (38). This has  
483 led to its use in anti-HIV clinical trials (NCT01433289 and NCT03141918, ClinicalTrials.gov). In  
484 agreement with EGCG antiviral activity on HIV-1 (38), we detected little p24<sup>Gag</sup> capsid protein in the  
485 cell culture supernatants in our reactivation experiments. We nevertheless observed, in our *ex vivo*  
486 patient cell cultures, that EGCG augmented the recovery of extracellular HIV-1 RNA. Thus, these



487 results suggest that reactivated virions were indeed destabilized by EGCG in cell culture supernatants.  
488 Furthermore, we showed that EGCG treatment was associated with a decreased expression of the  
489 cellular surface marker CD4 on target cells, thereby preventing subsequent new infections following  
490 reactivation. We thus showed the promising use of EGCG in HIV-1 eradication strategies due to its  
491 complementary and synergistic anti-HIV modes of action. On a larger perspective, we also showed the  
492 relevance of targeting UHRF1 in HIV-1 cure therapeutic strategies, in trend with the considerable  
493 attention for UHRF1 inhibitors in the cancer field (49). Our results indicate, however, that EGCG  
494 potency is not uniquely dependent on UHRF1 expression, rather this compound presents a pleiotropic  
495 function in HIV-1 reactivation, balancing the heterogeneity observed in viral reservoirs.

496 In conclusion, we developed a probabilistic methodology to decipher the DNA methylation-  
497 mediated mechanisms underlying the heterogeneous capacity of 5-AzadC to reactivate HIV-1 from  
498 latency. This approach enabled us to uncover the role of UHRF1, an epigenetic integrator, in HIV-1  
499 promoter silencing *via* DNA methylation. Our work provides a demonstration that the understanding of  
500 the molecular basis of the heterogeneous effects of LRAs, even in *in vitro* HIV-1 latency models, can  
501 bring to light new factors involved in HIV-1 silencing and hence, new targets to devise anti-HIV  
502 therapeutic approaches. As a proof-of-concept, we showed that EGCG, a known inhibitor of UHRF1,  
503 presents, in addition to its broad antiviral activities, a pleiotropic anti-latency activity, allowing its  
504 potential use in HIV-1 cure strategies.

## 505 **ACKNOWLEDGMENTS**

506 We thank the members of the ANRS (French National Agency for Research on AIDS and Viral  
507 Hepatitis) RHIVIERA (Remission of HIV Era) Consortium for helpful discussions. We thank the HIV-  
508 1<sup>+</sup> individuals for their willingness to participate in this study. We thank the nursing team of CHU Saint-  
509 Pierre Hospital (Elodie Goudeseune, Joëlle Cailleau and Annick Caestecker) who cared for the HIV<sup>+</sup>  
510 individuals. We thank Jacqueline Pineau from the transfusion center of Charleroi (Belgium) for  
511 providing blood from healthy donors. We thank Hilde Vereertbrugghen from Francis Corazza's  
512 laboratory for excellent technical assistance. We thank Motoko Unoki for precious advice regarding  
513 UHRF1 RNA interference. We thank Mítia Duerinckx and Benoît Van Driessche for probabilistic and  
514 statistics advice.

515 CVL acknowledges funding from the Belgian National Fund for Scientific Research (FRS-FNRS,  
516 Belgium), the « Fondation Roi Baudouin », the NEAT (European AIDS Treatment Network) program,  
517 the Internationale Brachet Stiftung, ViiV Healthcare, the Walloon Region (« Fonds de Maturation »),  
518 « Les Amis des Instituts Pasteur à Bruxelles, asbl », and the University of Brussels (Action de Recherche  
519 Concertée ULB grant) related to her work on HIV latency. The laboratory of CVL is part of the ULB-  
520 Cancer Research Centre (U-CRC). RV was funded by an “Aspirant” fellowship (F.R.S-FNRS) and a  
521 fellowship from “Les Amis des Instituts Pasteur à Bruxelles, asbl” and is a Belgian American  
522 Educational Foundation (BAEF) fellow and a scientific collaborator of the ULB. LN is supported by a  
523 “PDR” grant from the F.R.S-FNRS. GD is postdoctoral clinical master specialist for the F.R.S-FNRS.  
524 A A-A is a fellow of the “Wallonie-Bruxelles International” Program and of the Marie Skłodowska  
525 Curie COFUND action. EP is a fellow of the “Télévie Program” (F.R.S-FNRS). MB is funded by a  
526 FRIA fellowship (F.R.S.-FNRS). CVL is "Directeur de Recherches" at the F.R.S-FNRS. Work in OR's  
527 laboratory was supported by grants from the French agency for research on AIDS and viral hepatitis  
528 (ANRS), Sidaction and Alsace contre le Cancer. This project has received funding from the European  
529 Union's Horizon 2020 research and innovation program under grant agreement No 691119-  
530 EU4HIVCURE-H2020-MSCA-RISE-2015.

531

## 532 **AUTHOR CONTRIBUTIONS**

533 Conceived and designed the experiments: CVL, RV and SB. Performed the experiments: RV, SB, LN,  
534 GD, CV, AA-A, MB, EP, ND. Performed the HIV-1 DNA and RNA quantifications: AP, GD, VAF and  
535 AC. Performed the activation analyses: FC. Performed the primary models of HIV latency experiments:  
536 VLD, VG. Performed the Infinium analyses: MB and FF. Performed the ultra-sensitive p24 assays: AS-  
537 C. Performed HIV<sup>+</sup> individuals selection: CN, SDW. Analyzed the data: RV, SB, LN, GD, CV, AA-A,  
538 MB, EP, ND and CVL. Contributed in reagents/materials/analysis tools: CS, CR, BB, VG, OR. Wrote  
539 the paper: RV, SB and CVL.

## 540 **MATERIAL AND METHODS**

### 541 **Cell culture**

542 Jurkat, J-Lat 6.3, J-Lat 8.4, J-Lat 9.2, J-Lat 15.4 and the HEK293T cell lines were obtained from  
543 the AIDS Research and Reference Reagent Program (NIAID, NIH). Cells were grown in RPMI 1640  
544 medium (Gibco-BRL) supplemented with 10 % fetal bovine serum, 50 U/ml of penicillin and 50 µg/mL  
545 of streptomycin and were cultivated at 37°C in a 5% CO<sub>2</sub> atmosphere.

### 546 **Reagents and antibodies**

547 5-aza-2'-deoxycytidine (5-AzaC, A3656) and epigallocatechin-3-gallate (EGCG, E4143) were  
548 purchased from Sigma Aldrich. Antibodies against CREB (sc-186), CREM (sc-440), ATF-1 (sc-28673),  
549 MBD4 (sc-10753) and purified rabbit IgG (sc-2027) were purchased from Santa Cruz Biochemical.  
550 Antibodies against MBD1 (pAb-078-050) and UHRF1 (H00029128-B01P) were purchased from  
551 Diagenode and Abnova, respectively. Antibodies against MBD2/3 (07-199) and Kaiso (05-659) were  
552 purchased from Upstate/Millipore. Antibodies against MeCP2 (ab2828) and RBP-JK (ab33065) were  
553 purchased from Abcam. Antibodies against RNAPII (14958) were purchased from Cell Signaling.  
554 Secondary antibodies were purchased from Cell Signaling (7074 and 7076).

### 555 **Virus production assays**

556 HIV-1 production was measured in cell culture supernatants of cell cultures by ELISA assays on  
557 p24<sup>Gag</sup> using the INNOTEST HIV Antigen mAb kit per the manufacturer's instructions (Fujirebio).

### 558 **Sodium Bisulfite-mediated mapping of methylcytosines**

559 Genomic DNA was isolated using the DNeasy Blood and Tissue kit (Qiagen), then sodium  
560 bisulfite-converted (EpiTect Bisulfite kit, Qiagen). The 5'LTR or the *rev* regions were amplified by  
561 (semi)nested PCR (primer sequences are available upon request). At least 12 clones from each condition  
562 were sequenced, and clones with sodium bisulfite conversion higher than 95% were aligned on the HIV-  
563 1 NL4.3 reference sequence using ClustalΩ. MethTools (50) and Inkscape were used for graphical  
564 representations.

### 565 **Electrophoretic Mobility Shift Assays (EMSAs)**

566 Nuclear extracts were prepared using a protocol described by Dignam and colleagues (51).  
567 EMSAs, competition EMSAs and supershift assays were performed as described previously (48).

### 568 **Chromatin Immunoprecipitation assays**

569 ChIP assays were performed as previously described (52), using the ChIP assay kit from Millipore  
570 or equivalent homemade solutions. Relative quantification using standard curve method on the input  
571 was performed for each primer pair and 96-well Optical Reaction plates were read in a StepOnePlus  
572 PCR instrument (Applied Biosystems). Fold enrichments were calculated as fold inductions relative to  
573 the values measured with IgG. Primer sequences used for quantification are available upon request.

### 574 **Western Blot**

575 Western blotting was performed with 15µg of total protein extracts. The immunodetection was  
576 assessed using primary antibodies targeting UHRF1 or β-actin as loading control. Horseradish

577 peroxidase (HRP)-conjugated secondary antibodies were used for chemiluminescence detection (Cell  
578 Signaling).

#### 579 **RNA extraction and analysis of transcripts**

580 Total RNA samples were isolated using the Tri-Reagent (TRC-118, MRC), according to the  
581 manufacturer's protocol. Following DNase treatment (AM1907, Invitrogen), reverse transcription was  
582 performed with the PrimeScript RT reagent kit (RR037A, TaKaRa).

#### 583 **Lentiviral production and transduction assays**

584 TRC Lentiviral shRNA plasmids (pLKO.1) MISSION shRNA were obtained from Sigma-  
585 Aldrich (SHC002, TRCN0000273315, TRCN0000273256, TRCN0000273317 and TRC0000004352).  
586 The pMD2.G and the psPAX2 packaging system were obtained from Addgene. VSV-G pseudotyped  
587 particles were produced by transfection of HEK 293T cells as described previously(33). J-Lat cells were  
588 transduced as described previously (53).

#### 589 **Cellular proliferation assays and viability**

590 Cellular proliferation was evaluated by the colorimetric test WST-1 according to the  
591 manufacturer's instructions (Roche). Cellular viability was assessed by staining the cells with the  
592 LIVE/DEAD Fixable Near-IR Dead Cell Stain (Thermo Fisher) and analysis by flow cytometry on a  
593 FACSCantoII (Becton-Dickinson), using the FACSDiva Software (Becton-Dickinson).

#### 594 **Plasmid constructs and reporter assays**

595 The human UHRF1 expression vector (pCMV-HA-UHRF1, termed pUHRF1) was kindly  
596 provided by Dr Olivier Rohr. The non-episomal pLTR-Fluc vector was described previously (54). To  
597 obtain the pLTRme-Fluc vector, where only the LTR CpGs are methylated, we methylated *in vitro* the  
598 whole pLTR-Fluc construct using the SssI methyltransferase (New England Biolabs, M0226). The LTR  
599 fragment was then purified, cloned back in the parental reporter vector and the resulting pLTRme-Fluc  
600 vector was directly transfected without bacterial amplification.

#### 601 **Infinium 850K Human Methylation arrays**

602 Genomic DNA was extracted with the DNeasy Blood and Tissue Kit (QIAGEN) and converted  
603 with sodium bisulfite (EZ DNA Methylation Kit, Zymo Research). The quality of each analyzed sample  
604 was first evaluated by inspection of the control probes intensity level. Raw data (uncorrected probe  
605 intensity values) from the Infinium Methylation arrays were processed according to the recommended  
606 steps of Dedeurwaerder *et al.*(55). Beta-values were computed using the following formula: Beta-value  
607 =  $M/[U+M]$  where M and U are the raw "methylated" and "unmethylated" signals, respectively. Beta-  
608 values were corrected for type I and type II bias using the peak-based correction (56). Infinium  
609 HumanMethylation850K raw data were submitted to the NCBI's Gene Expression Omnibus (GEO)  
610 database (GSE139320, token : wnfqssiudxubtgx). Principal component analysis and hierarchical  
611 clustering were performed via an in-house R script using the most variable Infinium probes (standard  
612 deviation  $\geq 0.27$ ). For differential analysis, probes showing an absolute difference between case and  
613 control Beta-values higher than 0.3 were assumed significant. For pathway analysis, Infinium probes

614 located in promoter regions were first associated to their corresponding genes. Then, a « delta-Beta »  
615 was defined for each gene as the difference between case and control Beta-values of its promoter  
616 Infinium probe showing the highest absolute difference. Finally, genes were ranked according to their  
617 delta-Beta and submitted to the GSEA tool (41) to search for significant enrichments among the  
618 HALLMARK gene sets from MSigDB (<http://software.broadinstitute.org/gsea/msigdb/>).

### 619 **Study subjects**

620 We selected 22 HIV-1-infected individuals at the Saint-Pierre Hospital (Brussels, Belgium) based  
621 on the following criteria: all volunteers were treated with cART for at least 1 year, had an undetectable  
622 plasma HIV-1 RNA level (20 copies/ml) for at least 1 year, and had a level of CD4+ T lymphocytes  
623 higher than 300 cells/mm<sup>3</sup> of blood. Characteristics (age, CD4+ T cell count, CD4+ nadir, antiviral  
624 regimens, duration of therapy, duration with undetectable plasma HIV-1 RNA level, and HIV-1  
625 subtypes) of HIV<sup>+</sup> individuals from the Saint-Pierre Hospital were well documented and are presented  
626 in Table S1A. Buffy coats from healthy donors were obtained at the Belgian Red Cross.

### 627 **Ethical statement**

628 Ethical approval was granted by the Human Subject Ethics Committee of the Saint-Pierre Hospital  
629 (Brussels, Belgium). All individuals enrolled in the study provided written informed consent for  
630 donating blood.

### 631 **Isolation of CD8<sup>+</sup>-depleted PBMCs**

632 CD8<sup>+</sup>-depleted PBMCs used in reactivation assays were isolated from fresh whole blood of HIV<sup>+</sup>  
633 individuals as previously described (18).

### 634 **Quantitation of cell-associated HIV-1 unspliced RNA**

635 Total nucleic acids were extracted from pellets of CD8<sup>+</sup>-depleted PBMCs according to the Boom  
636 isolation method (57). Extracted cellular RNA was treated with DNase (DNA-free kit; Thermo Fisher  
637 Scientific) and reverse transcribed using the SuperScript III reverse transcriptase (Thermo Fisher  
638 Scientific). cDNA was used for the qPCR-based quantification of cell-associated HIV-1 unspliced RNA  
639 (amplicon in the *gag* region), as previously reported (58). HIV-1 RNA copy numbers were normalized  
640 to the total cellular RNA (by measurement of 18S ribosomal RNA) inputs as described previously (59).  
641 Non-template control wells were included in every qPCR run and were consistently negative.

### 642 **Quantification of HIV-1 extracellular RNA**

643 Total RNA was extracted from CD8<sup>+</sup>-depleted PBMCs *ex vivo* culture supernatants using the QIA  
644 amp Viral RNA Mini kit (Qiagen). HIV-1 RNA levels were quantified using the Generic HIV Viral  
645 Charge kit (Biocentric) according to the manufacturer's instructions.

### 646 **Quantification of total HIV-1 DNA**

647 Total cellular DNA was extracted from patient CD8<sup>+</sup>-depleted PBMCs *ex vivo* cultures using the  
648 QIAamp DNA Mini kit (Qiagen). The total cell-associated HIV-1 DNA was then quantified by ultra-  
649 sensitive real-time PCR (Generic HIV DNA cell kit, Biocentric) according to the manufacturer's  
650 instruction (60).

651 **Cell activation analysis by flow cytometry**

652 For cell activation analysis, CD8<sup>+</sup>-depleted PBMCs from blood of healthy donors were used to  
653 establish *ex vivo* cell cultures. Cells were collected 24 hours after stimulation with EGCG and were  
654 stained with relevant antibodies as previously described (18).

655 **Statistical analysis**

656 The demethylation probability following 5-AzadC treatment was calculated as follows:

657 
$$P(\text{demeth}) = 1 - \left( 1 - \frac{\#D(\text{treated})}{\#C(\text{total})} \right) \times \frac{\#C(\text{total})}{\#M(\text{mock})}$$

658 where P(demeth) corresponds to the probability of demethylation following treatment, #D(treated) the  
659 number of demethylated CpGs in the treated conditions, #C(total) the number of clones (12 for each  
660 condition in the present study) and where #M(mock) corresponds to the number of methylated CpGs in  
661 the mock-treated conditions. Sodium bisulfite sequencing data sets were analyzed using Fisher's exact  
662 test. For all the analyses, the threshold of statistical significance was set at 0.05. p-values ≤ 0.05 (\*: p-  
663 value ≤ 0.05, \*\*: p-value ≤ 0.01, \*\*\*: p-value ≤ 0.001) were considered statistically significant. All tests  
664 were two-sided. All analyses were performed using Prism version 6.0 (GraphPad software) and  
665 Microsoft Excel. Statistical tests are indicated in the corresponding figure legends.

666



667 **REFERENCES**

- 668 1. Deeks S, Autran B, Berkhout B, Benkirane M, Cairns S, Chomont N, Chun T-W, Churchill M, Di Mascio  
669 M, Katlama C, Lafeuillade A, Landay A, Lederman M, Lewin S, Maldarelli F, Margolis D, Markowitz M,  
670 Martinez-Picado J, Mullins J, Mellors J, Moreno S, O'Doherty U, Palmer S, Penicaud M-C, Peterlin M,  
671 Poli G, Routy J-P, Rouzioux C, Silvestri G, Stevenson M, Telenti A, Van Lint C, Verdin E, Woolfrey A,  
672 Zaia J, Barré-Sinoussi F. 2012. Towards an HIV cure: a global scientific strategy. *Nat Rev Immunol*  
673 12:607–14.
- 674 2. Trono D, Van Lint C, Rouzioux C, Verdin E, Barré-Sinoussi F, Chun T-W, Chomont N. 2010. HIV  
675 persistence and the prospect of long-term drug-free remissions for hiv-infected individuals. *Science* (80- )  
676 329:174–180.
- 677 3. Chun T-WW, Fauci AS. 2012. HIV reservoirs: Pathogenesis and obstacles to viral eradication and cure.  
678 *AIDS* 26:1261–1268.
- 679 4. Darcis G, Van Driessche B, Van Lint C. 2017. HIV Latency: Should We Shock or Lock? *Trends Immunol*  
680 38:217–228.
- 681 5. Spivak A, Planelles V. 2018. Novel Latency Reversal Agents for HIV-1 Cure. *Annu Rev Med* 69:421–  
682 436.
- 683 6. Mbonye U, Karn J. 2017. The Molecular Basis for Human Immunodeficiency Virus Latency. *Annu Rev*  
684 *Viro* 4:261–285.
- 685 7. Lange UC, Verdikt R, Ait-Ammar A, Van Lint C. 2020. Epigenetic crosstalk in chronic infection with  
686 HIV-1. *Semin Immunopathol* 42:187–200.
- 687 8. Verdikt R, Hernalsteens O, Lint C Van. 2021. Epigenetic Mechanisms of HIV-1 Persistence. *Vaccines*  
688 9:1–23.
- 689 9. Kauder S, Bosque A, Lindqvist A, Planelles V, Verdin E. 2009. Epigenetic regulation of HIV-1 latency  
690 by cytosine methylation. *PLoS Pathog* 5:1–15.
- 691 10. Blazkova J, Trejbalova K, Gondois-Rey F, Halfon P, Philibert P, Guiguen A, Verdin E, Olive D, Van Lint  
692 C, Hejnar J, Hirsch I. 2009. CpG methylation controls reactivation of HIV from latency. *PLoS Pathog* 5:1–  
693 14.
- 694 11. Chavez L, Kauder S, Verdin E. 2011. In vivo, in vitro, and in silico analysis of methylation of the HIV-1  
695 provirus. *Methods* 53:47–53.
- 696 12. Palacios JA, Pérez-Piñar T, Toro C, Sanz-Minguela B, Moreno V, Valencia E, Gómez-Hernando C, Rodés  
697 B. 2012. Long-term nonprogressor and elite controller patients who control viremia have a higher  
698 percentage of methylation in their HIV-1 proviral promoters than aviremic patients receiving highly active  
699 antiretroviral therapy. *J Virol* 86:13081–4.
- 700 13. Blazkova J, Murray D, Justement JS, Funk E, Nelson A, Moir S, Chun T-W, Fauci A. 2012. Paucity of  
701 HIV DNA Methylation in Latently Infected, Resting CD4+ T Cells from Infected Individuals Receiving  
702 Antiretroviral Therapy. *J Virol* 1–10.
- 703 14. Ho Y-C, Shan L, Hosmane N, Wang J, Laskey S, Rosenbloom D, Lai J, Blankson J, Siliciano J, Siliciano  
704 R. 2013. Replication-competent noninduced proviruses in the latent reservoir increase barrier to HIV-1  
705 cure. *Cell* 155:540–51.
- 706 15. Weber S, Weiser B, Kemal KS, Burger H, Ramirez CM, Korn K, Anastos K, Kaul R, Kovacs C, Doerfler

- 707 W. 2014. Epigenetic analysis of HIV-1 proviral genomes from infected individuals: Predominance of  
708 unmethylated CpG's. *Virology* 449:181–9.
- 709 16. Trejbalova K, Kovarova D, Blazkova J, Machala L, Jilich D, Weber J, Kucerova D, Vencálek O, Hirsch  
710 I, Hejnar J. 2016. Development of 5' LTR DNA methylation of latent HIV-1 provirus in cell line models  
711 and in long-term-infected individuals. *Clin Epigenetics* 8:1–20.
- 712 17. Cortés-Rubio CN, Salgado-Montes de Oca G, Prado-Galbarro FJ, Matías-Florentino M, Murakami-  
713 Ogasawara A, Kuri-Cervantes L, Carranco-Arenas AP, Ormsby CE, Cortés-Rubio IK, Reyes-Terán G,  
714 Ávila-Ríos S. 2019. Longitudinal variation in human immunodeficiency virus long terminal repeat  
715 methylation in individuals on suppressive antiretroviral therapy. *Clin Epigenetics* 11:1–17.
- 716 18. Bouchat S, Delacourt N, Kula A, Darcis G, Van Driessche B, Corazza F, Gatot J-S, Melard A, Vanhulle  
717 C, Kabeya K, Pardons M, Avettand-Fenoel V, Clumeck N, Wit S De, Rohr O, Rouzioux C, Van Lint C.  
718 2015. Sequential treatment with 5-aza-2'-deoxycytidine and deacetylase inhibitors reactivates HIV- 1.  
719 *EMBO Mol Med* 8:1–22.
- 720 19. Pereira L, Bentley K, Peeters A, Churchill M, Deacon N. 2000. A compilation of cellular transcription  
721 factor interactions with the HIV-1 LTR promoter. *Nucleic Acids Res* 28:663–8.
- 722 20. Jones C, Kadonaga JT, Luciw P, Tjian R. 1986. Activation of the AIDS Retrovirus Promoter by the  
723 Cellular Transcription Factor, Sp1. *Science* (80- ) 232:755–759.
- 724 21. Van Lint C, Amella CA, Emiliani SS, John M, Jie T, Verdin E. 1997. Transcription Factor Binding Sites  
725 Downstream of the Human Immunodeficiency Virus Type 1 Transcription Start Site Are Important for  
726 Virus Infectivity. *J Virol* 71:6113–6127.
- 727 22. Zhang X, Odom DT, Koo S-HH, Conkright MD, Canetti G, Best J, Chen H, Jenner R, Herbolsheimer  
728 E, Jacobsen E, Kadam S, Ecker JR, Emerson B, Hogenesch JB, Unterman T, Young RA, Montminy M.  
729 2005. Genome-wide analysis of cAMP-response element binding protein occupancy, phosphorylation, and  
730 target gene activation in human tissues. *Proc Natl Acad Sci* 102:4459–4464.
- 731 23. Bartels S, Spruijt C, Brinkman A, Jansen P, Vermeulen M, Stunnenberg H. 2011. A SILAC-Based Screen  
732 for Methyl-CpG Binding Proteins Identifies RBP-J as a DNA Methylation and Sequence- Specific Binding  
733 Protein. *PLoS One* 6:1–10.
- 734 24. Defossez P-A, Stancheva I. 2011. Biological functions of methyl-CpG-binding proteins., p. 377–98. *In*  
735 *Progress in Molecular Biology and Translational Science*.
- 736 25. Hashimoto H, Horton JR, Zhang X, Cheng X. 2009. UHRF1, a modular multi-domain protein, regulates  
737 replication-coupled crosstalk between DNA methylation and histone modifications. *Epigenetics* 4:8–14.
- 738 26. Fang J, Cheng J, Wang J, Zhang Q, Liu M, Gong R, Wang P, Zhang X, Feng Y, Lan W, Gong Z, Tang C,  
739 Wong J, Yang H, Cao C, Xu Y. 2016. Hemi-methylated DNA opens a closed conformation of UHRF1 to  
740 facilitate its histone recognition. *Nat Commun* 7:1–12.
- 741 27. Kim JK, Estève P-O, Jacobsen SE, Pradhan S. 2009. UHRF1 binds G9a and participates in p21  
742 transcriptional regulation in mammalian cells. *Nucleic Acids Res* 37:493–505.
- 743 28. Unoki M, Nishidate T, Nakamura Y. 2004. ICBP90, an E2F-1 target, recruits HDAC1 and binds to methyl-  
744 CpG through its SRA domain. *Oncogene* 23:7601–10.
- 745 29. Hopfner R, Mousli M, Jeltsch JM, Voulgaris A, Lutz Y, Marin C, Bellocq JP, Oudet P, Bronner C. 2000.  
746 ICBP90, a novel human CCAAT binding protein, involved in the regulation of topoisomerase II $\alpha$

- 747 expression. *Cancer Res* 60:121–128.
- 748 30. Sharif J, Muto M, Takebayashi S, Suetake I, Iwamatsu A, Endo T a, Shinga J, Mizutani-Koseki Y, Toyoda  
749 T, Okamura K, Tajima S, Mitsuya K, Okano M, Koseki H. 2007. The SRA protein Np95 mediates  
750 epigenetic inheritance by recruiting Dnmt1 to methylated DNA. *Nature* 450:908–12.
- 751 31. Ashraf W, Ibrahim A, Alhosin M, Zaayer L, Ouararhni K, Papin C, Ahmad T, Hamiche A, Mély Y,  
752 Bronner C, Mousli M. 2017. The epigenetic integrator UHRF1: on the road to become a universal  
753 biomarker for cancer. *Oncotarget* 8:51946–51962.
- 754 32. Pasternak AO, Adema KW, Bakker M, Jurriaans S, Berkhout B, Cornelissen M, Lukashov V V. 2008.  
755 Highly sensitive methods based on seminested real-time reverse transcription-PCR for quantitation of  
756 human immunodeficiency virus type 1 unspliced and multiply spliced RNA and proviral DNA. *J Clin*  
757 *Microbiol* 46:2206–2211.
- 758 33. Lucic M, Marini B, Ali H, Lucic B, Luzzati R, Giacca M. 2013. Proximity to PML nuclear bodies regulates  
759 HIV-1 latency in CD4+ T cells. *Cell Host Microbe* 13:665–677.
- 760 34. Bianchi C, Zangi R. 2013. UHRF1 discriminates against binding to fully-methylated CpG-Sites by steric  
761 repulsion. *Biophys Chem* 171:38–45.
- 762 35. Bashtrykov P, Jankevicius G, Jurkowska R, Ragozin S, Jeltsch A. 2013. The Uhrf1 protein stimulates the  
763 activity and specificity of the maintenance DNA methyltransferase Dnmt1 by an allosteric mechanism. *J*  
764 *Biol Chem* 0–18.
- 765 36. Bostick M, Kim JK, Estève P-O, Clark A, Pradhan S, Jacobsen SE. 2007. UHRF1 plays a role in  
766 maintaining DNA methylation in mammalian cells. *Science* (80- ) 317:1760–4.
- 767 37. Achour M, Mousli M, Alhosin M, Ibrahim A, Peluso J, Muller CD, Schini-Kerth V, Hamiche A, Dhe-  
768 Paganon S, Bronner C. 2013. Epigallocatechin-3-gallate up-regulates tumor suppressor gene expression  
769 via a reactive oxygen species-dependent down-regulation of UHRF1. *Biochem Biophys Res Commun*  
770 430:208–12.
- 771 38. Yamaguchi K, Honda M, Ikigai H, Hara Y, Shimamura T. 2002. Inhibitory effects of (–)-epigallocatechin  
772 gallate on the life cycle of human immunodeficiency virus type 1 (HIV-1). *Antiviral Res* 53:19–34.
- 773 39. Singh BN, Shankar S, Srivastava RK. 2011. Green tea catechin , epigallocatechin-3-gallate ( EGCG ):  
774 Mechanisms, perspectives and clinical applications. *Biochem Pharmacol* 82:1807–1821.
- 775 40. Moran S, Arribas C, Esteller M. 2016. Validation of a DNA methylation microarray for 850,000 CpG sites  
776 of the human genome enriched in enhancer sequences. *Epigenomics* 8:389–399.
- 777 41. Subramanian A, Tamayo P, Mootha VK, Mukherjee S, Ebert BL, Gillette MA, Paulovich A, Pomeroy SL,  
778 Golub TR, Lander ES, Mesirov JP. 2005. Gene set enrichment analysis: A knowledge-based approach for  
779 interpreting genome-wide expression profiles. *Proc Natl Acad Sci U S A* 102:15545–15550.
- 780 42. Williamson MP, McCormick TG, Nance CL, Shearer WT. 2006. Epigallocatechin gallate, the main  
781 polyphenol in green tea, binds to the T-cell receptor, CD4: Potential for HIV-1 therapy. *J Allergy Clin*  
782 *Immunol* 118:1369–1374.
- 783 43. Spina CA, Anderson J, Archin NM, Bosque A, Chan J, Famiglietti M, Greene W, Kashuba A, Lewin S,  
784 Margolis D, Mau M, Ruelas D, Saleh S, Shirakawa K, Siliciano R, Singhanian A, Soto P, Terry V, Verdin  
785 E, Woelk C, Wooden S, Xing S, Planelles V. 2013. An In-Depth Comparison of Latent HIV-1 Reactivation  
786 in Multiple Cell Model Systems and Resting CD4 + T Cells from Aviremic Patients. *PLoS Pathog* 9:1–

- 787 15.
- 788 44. Vazquez B, Laguna T, Carabana J, Krangel M, Lauzurica P. 2009. CD69 Gene Is Differentially Regulated  
789 in T and B Cells by Evolutionary Conserved Promoter-Distal Elements. *J Immunol* 1–10.
- 790 45. Darcis G, Kula A, Bouchat S, Fujinaga K, Corazza F, Ait-Ammar A, Delacourt N, Melard A, Kabeya K,  
791 Vanhulle C, Van Driessche B, Gatot JS, Cherrier T, Pianowski L, Gama L, Schwartz C, Vila J, Burny A,  
792 Clumeck N, Moutschen M, De Wit S, Peterlin BM, Rouzioux C, Rohr O, Van Lint C. 2015. An In-Depth  
793 Comparison of Latency-Reversing Agent Combinations in Various In Vitro and Ex Vivo HIV-1 Latency  
794 Models Identified Bryostatin-1+JQ1 and Ingenol-B+JQ1 to Potently Reactivate Viral Gene Expression.  
795 *PLoS Pathog* 11:1–36.
- 796 46. Kula A, Delacourt N, Bouchat S, Darcis G, Avettand-Fenoel VV, Verdikt R, Corazza F, Necsoi C,  
797 Vanhulle C, Bendoumou M, Burny A, De Wit SS, Rouzioux C, Rohr OO, Van Lint C. 2019.  
798 Heterogeneous HIV-1 Reactivation Patterns of Disulfiram and Combined Disulfiram + Romidepsin  
799 Treatments. *J Acquir Immune Defic Syndr* 80:605–613.
- 800 47. Ait-Ammar A, Kula A, Darcis G, Verdikt R, De Wit S, Gautier V, Mallon PWG, Marcello A, Rohr O,  
801 Van Lint C. 2019. Current Status of Latency Reversing Agents Facing the Heterogeneity of HIV-1 Cellular  
802 and Tissue Reservoirs. *Front Microbiol* 10:3060.
- 803 48. Pierard V, Guiguen A, Colin L, Wijmeersch G, Vanhulle C, Van Driessche B, Dekoninck A, Blazkova J,  
804 Cardona C, Merimi M, Vierendeel V, Calomme C, Nguyễn TL-A, Nuttinck M, Twizere J-C, Kettmann R,  
805 Portetelle D, Burny A, Hirsch I, Rohr O, Van Lint C. 2010. DNA cytosine methylation in the bovine  
806 leukemia virus promoter is associated with latency in a lymphoma-derived B-cell line: potential  
807 involvement of direct inhibition of cAMP-responsive element (CRE)-binding protein/CRE  
808 modulator/activation transcription. *J Biol Chem* 285:19434–49.
- 809 49. Patnaik D, Estève P-O, Pradhan S. 2018. Targeting the SET and RING-associated (SRA) domain of  
810 ubiquitin-like, PHD and ring finger – containing 1 (UHRF1) for anti-cancer drug development. *Oncotarget*  
811 9:26243–26258.
- 812 50. Grunau C, Schattevoy R, Mache N, Rosenthal A. 2000. MethTools : a toolbox to visualize and analyze  
813 DNA methylation data. *Nucleic Acids Res* 28:1053–1058.
- 814 51. Dignam JD, Lebovitz RM, Roeder RG. 1983. Accurate transcription initiation by RNA polymerase II in a  
815 soluble extract from isolated mammalian nuclei. *Nucleic Acids Res* 11:1475–1489.
- 816 52. Colin L, Vandenhoudt N, de Walque S, van Driessche B, Bergamaschi A, Martinelli V, Cherrier T,  
817 Vanhulle C, Guiguen A, David A, Burny A, Herbein G, Pancino G, Rohr O, van Lint C. 2011. The AP-1  
818 binding sites located in the pol gene intragenic regulatory region of HIV-1 are important for viral  
819 replication. *PLoS One* 6:1–19.
- 820 53. Naldini L, Blomer U, Galloway P, Ory D, Mulligan R, Gage FH, Verma IM, Trono D. 1996. In vivo gene  
821 delivery and stable transduction of post mitotic cells by a lentiviral vector. *Science (80- )* 272:263–267.
- 822 54. Marban C, Suzanne S, Dequiedt F, De Walque S, Redel L, Van Lint C, Aunis D, Rohr O. 2007.  
823 Recruitment of chromatin-modifying enzymes by CTIP2 promotes HIV-1 transcriptional silencing.  
824 *EMBO J* 26:412–423.
- 825 55. Dedeurwaerder S, Defrance M, Bizet M, Calonne E, Bontempi G, Fuks F. 2013. A comprehensive  
826 overview of Infinium Human Methylation450 data processing. *Brief Bioinform* 15:929–941.

- 827 56. Dedeurwaerder S, Defrance M, Calonne E. 2011. Evaluation of the Infinium Methylation 450K technology  
828 T echnology R eport. *Futur Med* 3:771–784.
- 829 57. Boom R, Sol C, Salimans M, Jansen C, Wertheim-Van Dillen P, Van der Noordaa J. 1990. Rapid and  
830 Simple Method for Purification of Nucleic Acids. *J Clin Microbiol* 28:495–503.
- 831 58. Malnati MS, Scarlatti G, Gatto F, Salvatori F, Cassina G, Rutigliano T, Volpi R, Lusso P. 2008. A universal  
832 real-time PCR assay for the quantification of group-M HIV-1 proviral load. *Nat Protoc* 3:1240–1248.
- 833 59. Pasternak AO, Jurriaans S, Bakker M, Prins J, Berkhout B, Lukashov V. 2009. Cellular Levels of HIV  
834 Unspliced RNA from Patients on Combination Antiretroviral Therapy with Undetectable Plasma Viremia  
835 Predict the Therapy Outcome. *PLoS One* 4.
- 836 60. Avettand-Fenoel V, Chaix M-L, Blanche S, Burgard M, Floch C, Toure K, Allemon M-C, Warszawski J,  
837 Rouzioux C. 2009. LTR Real-Time PCR for HIV-1 DNA Quantitation in Blood Cells for Early Diagnosis  
838 in Infants Born to Seropositive Mothers Treated in HAART Area. *J Med Virol* 81:217–223.
- 839 61. Kuiken C, Leitner T, Foley B, Hahn B, Marx P, McCutchan F, Wolinsky S, Korker Bette. 2008. HIV  
840 Sequence Compendium 2008. Los Alamos, New Mexico.
- 841

842 **TABLE AND FIGURE LEGENDS**

843 **Figure 1: 5-AzadC-induced reactivation of HIV-1 gene expression from latency is associated with**  
844 **5'LTR CGIs demethylation.**

845 (A) Schematic presentation of the three CpG islands studied along the HIV-1 provirus, in the  
846 HIV-1 promoter (5'LTR and NCR CGIs) and in *rev* (ETR CGI). The reactivation of HIV-1 production  
847 following 72h treatment with 400nM of 5-AzadC, quantified by ELISA on p24<sup>Gag</sup> capsid protein in  
848 culture supernatants, and the DNA methylation profile, established by sodium bisulfite sequencing for  
849 the three CGIs, are respectively presented for the J-Lat 6.3 cells (**B and C**), the J-Lat 8.4 cells (**D and**  
850 **E**), the J-Lat 9.2 cells (**F and G**) and the J-Lat 15.4 cells (**H and I**). ELISA results are representative of  
851 the means  $\pm$  SD of three independent 5-AzadC treatments. Folds reactivation are indicated.  
852 Unmethylated and methylated CpG dinucleotides are respectively represented with open and closed  
853 circles, where each line corresponds to individual sequenced molecules. The global methylation level  
854 presented correspond to mean percentages of methylated CpGs for the twelve clones of each condition,  
855 either on the promoter CGIs (5'LTR + NCR CGIs considered together) or on the ETR CGI. Statistical  
856 significance was determined by unpaired T test.

857

858 **Figure 2: UHRF1 binds *in vitro* to the methylated DDMP5 and *in vivo* to the latent HIV-1**  
859 **promoter.**

860 (A) The radiolabeled unmethylated or the methylated HIV-1 DDMP5 probe (respectively  
861 indicated as "DDMP5" and "DDMP5-me") were incubated with 10 $\mu$ g of nuclear extracts from Jurkat T  
862 cells ("Jurkat NE") and either with a purified rabbit IgG as a negative control (lane 3 and lane 9), or  
863 with an antibody directed against CREB/CREM family members including CREB (lane 4 and lane 10),  
864 CREM (lane 5 and lane 11) or ATF1 (lane 6 and lane 12). The figure shows the specific retarded bands  
865 of interest indicated by arrows. Supershifted complexes are indicated by asterisks. One representative  
866 experiment out of three is presented. (B) The "DDMP5" or "DDMP5-me" probes were incubated with  
867 10 $\mu$ g of Jurkat cells NE, and either with purified rabbit IgG as a negative control (lane 5), or with an  
868 antibody directed against methylcytosines-recognizing proteins, including MBD2 (lane 6), MBD4 (lane  
869 7), Kaiso (lane 8), UHRF1 (lane 9), MeCP2 (lane 10) and RBP-JK (lane 11). The figure shows the  
870 specific retarded bands of interest indicated by arrows. Supershifted complexes are indicated by  
871 asterisks. One representative experiment out of three is presented. (C) Chromatin preparations of J-Lat  
872 8.4 cells, either mock-treated or treated with 400nM of 5-AzadC for 72h, were immunoprecipitated with  
873 an anti-UHRF1 antibody or with purified rabbit IgG, serving as a negative control. qPCRs were  
874 performed with primers hybridizing specifically to the 5'LTR, in the Nuc-1 region. Fold enrichments  
875 relative to IgG are presented, where fold enrichments for each immunoprecipitated DNA were calculated  
876 by relative standard curve on input DNA. Values represent the means of duplicate samples  $\pm$  SD.  
877 Statistical significance was calculated with an unpaired T test. One representative experiment out of  
878 three is presented. (D) Chromatin preparation of J-Lat 6.3 cells, J-Lat 9.2 cells and J-Lat 15.4 cells were



879 immunoprecipitated with anti-UHRF1 or purified rabbit IgG as a negative control. qPCR were  
880 performed with primers hybridizing specifically to the 5'LTR, in the Nuc-1 region. Fold enrichments  
881 relative to IgG are presented, where fold enrichments for each immunoprecipitated DNA was calculated  
882 by relative standard curve on input DNA. Values represent the means  $\pm$  S.D of one representative  
883 experiment out of three. (E) Spearman correlation was calculated between the percentage of methylation  
884 on DDMP5 and UHRF1 recruitment fold specific to the HIV-1 promoter, based on dataset from Figure  
885 1, Figure 2C and Figure 2D.

886

887 **Figure 3: UHRF1 silencing of HIV-1 transcription is dependent on 5'LTR methylation.**

888 (A) Chromatin was prepared from J-Lat 8.4 cells, either mock-transduced, control-transduced (with non-  
889 targeting shRNA, indicated as “shNT-transduced”) or shUHRF1-transduced (indicated as “shUHRF1-  
890 transduced”). Immunoprecipitations were performed using anti-RNAPII or purified rabbit IgG, as a  
891 negative control. qPCRs were performed with primers hybridizing specifically to the 5'LTR, in the Nuc-  
892 1 region. Fold enrichments relative to IgG are presented, where fold enrichments for each  
893 immunoprecipitated DNA were calculated by relative standard curve on input DNA. Values represent  
894 the means of duplicate samples  $\pm$  SD. (B) Total RNA preparations from mock-transduced, shNT-  
895 transduced or shUHRF1-transduced J-Lat 8.4 cells were reverse transcribed. Initiated (TAR region),  
896 elongated (*tat* region) transcripts, or HIV-1 multiple-spliced RNA (MS RNA) were quantified by RT-  
897 qPCR using GAPDH as first normalizer and the mock-transduced condition as second normalizer.  
898 Means from duplicate  $\pm$  SD are indicated. (C) Cultures supernatants from mock-transduced, shNT-  
899 transduced or shUHRF1-transduced J-Lat 8.4 cells were probed for viral production as measured by  
900 ELISA on p24<sup>Gag</sup> capsid protein. (D) DNA methylation mapping performed by sodium bisulfite  
901 sequencing is presented for the promoter CGIs or the intragenic ETR CGI in J-Lat 8.4 cells mock-  
902 transduced, shNT-transduced or shUHRF1-transduced, as indicated. Unmethylated and methylated CpG  
903 dinucleotides are respectively represented with open and closed circles, where each line corresponds to  
904 individual sequenced molecules. The global methylation level presented correspond to mean  
905 percentages of methylated CpGs for the twelve clones of each condition, either for the promoter CGIs  
906 considered together (5'LTR + NCR CGIs) or for the ETR CGI. Panel A to D originate from the same  
907 representative experiment out of three. (E) Chromatin was prepared from J-Lat 8.4 cells, either mock-  
908 transduced or shUHRF1-transduced. Immunoprecipitations were performed using anti-DNMT1, anti-  
909 G9a or purified rabbit IgG, as a negative control. qPCRs were performed with primers hybridizing  
910 specifically to the 5'LTR, in the Nuc-1 region. Fold enrichments relative to IgG are presented, where  
911 fold enrichments for each immunoprecipitated DNA were calculated by relative standard curve on input  
912 DNA. Values represent the means of duplicate samples  $\pm$  SD. (F) HEK293T cells were transfected either  
913 with 600ng of the pshNT vector or with 600ng of the pshUHRF1#4. Twenty-four hours after this initial  
914 transfection, 400ng of the pLTR-Fluc, the pLTRme-Fluc or the pLTR'Cpg5me)-Fluc reporter constructs  
915 together with or without 200ng of the plasmid overexpressing UHRF1 (pUHRF1) were co-transfected.

916 Luciferase activities were measured in the cell lysates after further 24h post-transfection. Results are  
917 presented as histograms of “relative luciferase units” (R.L.U.), corresponding to the Fluc activity  
918 normalized to the total levels of proteins. Means and standard errors of triplicate samples are  
919 represented. An experiment representative of three independent experiments is shown. Statistical  
920 significance was assessed by an unpaired T test. **(G)** UHRF1 and  $\beta$ -actin, serving as a loading control,  
921 protein levels were assessed by immunoblot in cell lysates of the corresponding transfection points.

922

923 **Figure 4: HIV-1 transcription is reactivated from latency upon UHRF1 downregulation by**  
924 **epigallo-catechin-3-gallate.**

925 **(A)** Total RNA preparations from J-Lat 8.4 cells mock-treated or treated with increasing doses of  
926 EGCG for 24h were used in RT-qPCR to quantify initiated (TAR region), *gag*, elongated (*tat* region)  
927 transcripts, or HIV-1 MS RNA, using GAPDH as normalizer. **(B)** After 24h of EGCG increasing doses  
928 treatment, J-Lat 8.4 cells were analyzed by flow cytometry to quantify the percentage of GFP+ cells.  
929 **(C)** WST-1 proliferation assay, reflective of metabolic activity, was performed on J-Lat 8.4 cells treated  
930 for 24h with increasing doses of EGCG. The result obtained with mock-treated cells was set a value of  
931 100%. A, B and C originate from the same representative experiment out of three. Means  $\pm$  SD of  
932 duplicates are presented. Statistical significance was calculated with an unpaired T test and corresponds  
933 to comparisons to the mock-treated condition. **(D)** J-Lat 8.4 cells, either mock-transduced or shUHRF1-  
934 transduced were treated for 24h with 70 $\mu$ g/mL of EGCG. The percentage of GFP positive cells was  
935 assessed by flow cytometry and was normalized to the respective mock conditions. Means  $\pm$  SD of  
936 duplicates representative of three independent experiments are presented. Statistical significance was  
937 assessed by an unpaired T test. **(E)** Whole protein levels of the experiments presented in Fig. 4D were  
938 loaded and probed for the presence of UHRF1 and  $\beta$ -actin, serving as a loading control. **(F)**  
939 Quantification of the western blot presented in Fig. 4E was performed in ImageJ. Means  $\pm$  SD of two  
940 independent quantifications are presented. Statistical significance was assessed by an unpaired T test.  
941 **(G)** An Infinium assay with gDNA from above was conducted. Differential methylated CpGs upon  
942 EGCG treatment were plotted on a pie chart, where the black slice represents hypermethylated CpGs  
943 and the white slice represents hypomethylated CpGs. **(H)** ) An Infinium assay with gDNA from Fig. 3  
944 was conducted. Differential methylated CpGs upon shUHRF1 transduction were plotted on a pie chart,  
945 where the black slice represents hypermethylated CpGs and the white slice represents hypomethylated  
946 CpGs. **(I)** Venn diagram representing the number of hypomethylated CpGs in both conditions is  
947 presented.

948

949 **Figure 5: EGCG reactivates the expression of viral RNA in *ex vivo* cultures of CD8<sup>+</sup>-depleted**  
950 **PBMCs isolated from cART-treated aviremic HIV-1+ individuals.**

951 *Ex vivo* cultures of CD8<sup>+</sup>-depleted PBMCs isolated from 22 cART-treated aviremic HIV<sup>+</sup> individuals  
952 were mock-treated or treated for 24h with EGCG, at the indicated concentrations, or with anti-

953 CD3+anti-CD28 antibodies serving as positive control stimulation. **(A)** Total intracellular RNA was  
954 extracted and cell-associated HIV-1 US RNA was quantified. Medians are represented. Open circles  
955 depict undetectable values, censored to the assay detection limits. The latter depended on the amounts  
956 of input cellular RNA and therefore differed between samples. Statistical significance was determined  
957 by paired Wilcoxon tests, where pairs were included in the analysis only when either (i) both values in  
958 a pair were detectable, or (ii) one value in a pair was undetectable and the other detectable, and the  
959 maximal value of the undetectable (the assay detection limit) was lower than the detectable. **(B)** In 7 out  
960 of 22 HIV<sup>+</sup> individuals, the concentration of HIV-1 extracellular genomic RNA in culture supernatants  
961 was also determined (in copies/ml).

962

963 **Table 1: Most statistically significant 5-AzadC-induced differentially-demethylated CpG**  
964 **dinucleotides (DDMPs).**

965 <sup>a</sup> Position given in coordinates where nt+1 is located at the junction U3/R in the 5'LTR.

966 <sup>b</sup> Statistical significance attributed with \* for  $p \leq 0.05$ , \*\* for  $p \leq 0.01$  and \*\*\* for  $p \leq 0.001$  by Fisher's  
967 exact test.

968 <sup>c</sup> Location of CpG within regulatory or structural elements according to the HIV-1 Database (19, 61).

969 N/A refers to no known features.

970 <sup>d</sup> Differentially-Demethylated Position.

971 DDMPs located in transcription factor binding sites are in bold.

972

973 **Figure S1: Mapping of 5-AzadC-induced demethylation probability reveals hotspots of**  
974 **demethylation.**

975 **(A)** Schematic view of CpG dinucleotides position in the 5'LTR and transcription factor binding sites  
976 positions. The individual probabilities of 5-AzadC-induced demethylation at each CpG dinucleotide,  
977 presented in histograms on the left Y axis and associated p-values (Fisher's exact test), presented in blue  
978 on the right Y axis, was calculated in J-Lat 6.3 cells **(B)**, in J-Lat 8.4 cells **(C)**, in J-Lat 9.2 cells **(D)** and  
979 in J-Lat 15.4 cells **(E)** using the data presented in Figure 1. Statistically significant DDMPs located in  
980 transcription factor binding sites are highlighted and indicated by an arrow.

981

982 **Figure S2: Methylation of DDMP5 promotes the sequence-specific and methylation-specific *in***  
983 ***vitro* binding of an additional factor.**

984 **(A)** The radiolabeled unmethylated or methylated HIV-1 DDMP5 probe was incubated with 10 $\mu$ g  
985 of Jurkat cells NE, in the absence of competitor, or in presence of increasing molar excesses of the  
986 unlabeled homologous, respectively methylated (lanes 7-9 and lanes 11-13) or unmethylated (lanes 3-5  
987 and lanes 15-17), HIV-1 DDMP5 oligonucleotides. **(B)** The quantification of the band corresponding to  
988 the C1 complex for the competition with the unmethylated competitor (equivalent to the lanes 3-5) and  
989 the methylated competitor (equivalent to the lanes 7-9) is presented. Statistical significance was

990 calculated by an unpaired T test. **(C)** The methylated HIV-1 DDMP5 radiolabeled probe was incubated  
991 with 10 $\mu$ g of Jurkat NE, in the absence of competitor, or in presence of increasing molar excesses of the  
992 heterologous unlabeled methylated MBD consensus (indicated as “MBD-me”, lanes 3-5)) or methylated  
993 Sp1 consensus (indicated as “Sp1-me”, lanes 7-10) oligonucleotides. Binding reactions were analyzed  
994 by PAGE, and retarded complexes were visualized by autoradiography. The major DNA-protein  
995 complexes C1 and C2 are indicated by arrows. The figure shows only the specific retarded bands of  
996 interest. One representative experiment out of three is presented.

997

998 **Figure S3: UHRF1 expression is not affected by 5-AzadC.**

999 **(A)** Total RNA preparations from the J-Lat 8.4 cells, either mock-treated or treated with 400nM  
1000 of 5-AzadC for 72h were reverse transcribed. UHRF1 transcripts were quantified by reverse  
1001 transcription qPCR using GAPDH as a normalizer. Means from duplicates  $\pm$  SD are indicated. Statistical  
1002 significance was calculated with an unpaired T test. One representative experiment out of three is  
1003 presented. **(B)** Total protein extracts from the same stimulation as in (D) were extracted. UHRF1 was  
1004 immunodetected by western blotting using a specific antibody. Levels of  $\beta$ -actin were measured to  
1005 control protein loading. One representative experiment out of three is presented.

1006

1007 **Figure S4: UHRF1 depletion in J-Lat 8.4 cells following shUHRF1 transduction provokes**  
1008 **reactivation of HIV-1 and specific demethylation patterns in the viral promoter.**

1009 **(A)** UHRF1 and  $\beta$ -actin, serving as a loading control, protein levels were assessed by immunoblot  
1010 in whole-cell lysates of J-Lat 8.4 cells mock-transduced, transduced with a control shRNA (indicated as  
1011 “shNT-transduced”) or transduced with four independent shUHRF1 (indicated as “shUHRF1#1-4-  
1012 transduced”). **(B)** Total RNA preparations were used in RT-qPCR to quantify UHRF1 transcripts, using  
1013 GAPDH as a first normalizer and the mock-transduced condition as second normalizer. Values  
1014 correspond to means  $\pm$  SD of two independent qPCRs. **(C)** The quantity of p24<sup>Gag</sup> in the culture  
1015 supernatants was evaluated by ELISA. Results are representative of the mean  $\pm$  SD two independent  
1016 ELISA quantifications. The whole panel originates from one representative experiment out of three.  
1017 Statistical significance was assessed by an unpaired T test and corresponds, if not otherwise specified,  
1018 to comparisons to the mock-transduced condition. **(D)** Schematic view of CpG dinucleotides position in  
1019 5’LTR and transcription factor binding sites positions. The individual probabilities of 5-AzadC-induced  
1020 demethylation at each CpG dinucleotide, presented in histograms on the left Y axis and associated p-  
1021 values (Fisher’s exact test), presented in blue on the right Y axis, was calculated in J-Lat 8.4 cells shNT-  
1022 transduced in comparison to mock-transduced cells **(E)**, in J-Lat 8.4 cells shUHRF1-transduced in  
1023 comparison to shNT-transduced cells **(F)** and in in J-Lat 8.4 cells shUHRF1-transduced in comparison  
1024 to mock-transduced cells **(G)**, using the data presented in Figure 3. Statistically significant DDMPs  
1025 located in transcription factor binding sites are highlighted.

1026

1027 **Figure S5: UHRF1 is downregulated in J-Lat 8.4 cells following EGCG treatment.**

1028 (A) UHRF1 and  $\beta$ -actin, serving as a loading control, protein levels were assessed by immunoblot in  
1029 whole-cell lysates of J-Lat 8.4 cells mock-treated or treated with increasing doses of EGCG for 24h. (B)  
1030 Total RNA preparations from the same experiment as in A were used in RT-qPCR to quantify UHRF1  
1031 transcripts, using GAPDH as a first normalizer and the mock-treated condition as second normalizer.  
1032 One representative experiment is shown out of three. Statistical significance was assessed using an  
1033 unpaired T test. (C) The quantity of p24<sup>Gag</sup> in the culture supernatants of mock-treated or EGCG-treated  
1034 J-Lat 8.4 cells was evaluated by ELISA. Results are representative of the mean  $\pm$  SD of three  
1035 independent EGCG treatment. The limit of the test detection at 10pg/mL is indicated. Statistical  
1036 significance was assessed using an unpaired T test.

1037

1038 **Figure S6: Methylome-wide analyses of shUHRF1 and EGCG-induced hypomethylation show**  
1039 **different patterns.**

1040 (A) Hierarchical clustering was performed on the most variable CpGs obtained in the Infinium  
1041 assay for the genomic DNA samples of Fig. 3 and Fig. 4. (B) Principal component analysis was  
1042 performed on the most variable CpGs obtained in the Infinium assay for the genomic DNA samples of  
1043 Fig. 3 and Fig. 4. (C) Enriched pathways corresponding to the differential DNA methylation profile  
1044 upon EGCG treatment were analyzed by GSEA. Grey bars represent non-significant pathways, purple  
1045 bars represent statistically significant common pathways and white bars represent statistically  
1046 significant but not common pathways. (D) Enriched pathways corresponding to the differential DNA  
1047 methylation profile upon shUHRF1 transduction were analyzed by GSEA.

1048

1049 **Figure S7: Effects of EGCG on cellular viability, metabolic activity, cell surface activation**  
1050 **markers and CD4 expression in CD8<sup>+</sup>-depleted PBMCs from healthy donors.**

1051 CD8<sup>+</sup>-depleted PBMCs were extracted from six healthy donors blood samples and were mock-  
1052 treated or treated for 24h with the indicated doses of EGCG, or with anti-CD3+anti-CD28 antibodies  
1053 serving as positive control stimulation. (A) Cells were stained for CD4<sup>+</sup> and LIVE/DEAD Fixable Near-  
1054 IR Dead Cell Stain to discriminate between viable and non-viable cells. Medians percentages are  
1055 indicated. (B) WST-1 proliferation assay, reflective of metabolic activity, was performed on the cells.  
1056 Median percentages are indicated. HLA-DR (C), CD25 (D), CD69 (E) and CD38 (F) expression was  
1057 analyzed by flow cytometry. Results are presented as percentage of marker expression in alive CD4<sup>+</sup>-  
1058 gated cell populations. Medians for each condition are presented. (G) Mean fluorescence intensity (MFI)  
1059 associated with CD4 serves as a surrogate for CD4 surface expression. Medians for each condition are  
1060 presented. Statistical significance was calculated by paired comparisons between each treated condition  
1061 (Wilcoxon test).

1062

1063



1064 **Figure S8: HIV-1 proviruses are statistically more transcriptionally active in EGCG-treated *ex***  
1065 ***vivo* patient cell cultures.**

1066 (A) Comparison of HIV-1 intracellular US RNA/DNA ratios between mock-treated, EGCG  
1067 50µg/mL, EGCG 70µg/mL and positive control stimulations of *ex vivo* patient X15 to X22 cultures is  
1068 presented. (B) Comparison of HIV-1 extracellular RNA/DNA ratios between mock-treated, EGCG  
1069 50µg/mL, EGCG 70µg/mL and positive control stimulations of *ex vivo* patient X15 to X22 cultures is  
1070 presented. In both panels, statistical significance was calculated by paired comparisons between each  
1071 treated condition (Wilcoxon test). (C) The ratios of HIV intracellular US RNA/DNA or extracellular  
1072 RNA/DNA were calculated for the individuals X15 to X22. Of note, individual X20 was excluded due  
1073 to high level of extracellular HIV-1 RNA in mock-treated condition at 24h post-stimulation.

1074 **Figure S9: EGCG reactivation potency *ex vivo* correlates to temporal parameters of infection in**  
1075 **HIV<sup>+</sup> individuals and follows the DNA methylation level of the viral promoter.**

1076 For HIV<sup>+</sup> individuals presenting detectable values of cell-associated HIV-1 US RNA, fold inductions  
1077 over mock condition were calculated, based on the data presented in Fig. 5A. Spearman correlations  
1078 between quantity of cell-associated HIV-1 US RNA for 50µg/mL of EGCG and time of treatment (A)  
1079 or time as aviremic (B) were calculated based on the data presented in Table S1. In (C), raw values of  
1080 Spearman  $\rho$  and associate p-values for each condition are presented. (D) The methylation status for 8  
1081 individuals out of 22 was obtained by sodium bisulfite sequencing. We clustered individuals in groups  
1082 presenting non-methylated or methylated 5'LTR and analyzed their respective median EGCG  
1083 reactivation capacity, in terms of cell-associated HIV-1 US RNA for 50µg/mL of EGCG.

1084

1085 **Table S1: EGCG induces HIV-1 recovery in CD8<sup>+</sup>-depleted PBMCs from aviremic cART-treated**  
1086 **HIV<sup>+</sup> individuals**

1087 (A) HIV<sup>+</sup> individuals' clinical characteristics are listed. ART= antiretroviral therapy, ATV= atazanavir,  
1088 DRV= darunavir, DTG= dolutegravir EFV= efavirenz, EVP= eviplera (rilpivirine, emtricitabine,  
1089 tenofovir), GENVOYA= elvitegravir/cobicistat/emtricitabine/tenofovir, K VX = kivexa, NPV =  
1090 nevirapine, RTV = ritonavir, RPV=rilpivirine, STB = elvitegravir, cobicistat, emtricitabine, tenofovir,  
1091 TRI= triple cocktail, TRU = Truvada and “?” = unknown. (B) *Ex vivo* cultures of CD8<sup>+</sup>-depleted PBMCs  
1092 purified from blood of 22 aviremic cART-treated HIV<sup>+</sup> individuals were mock-treated or treated with  
1093 anti-CD3+anti-CD28 antibodies, as positive control stimulation, or with EGCG 50µg/mL or EGCG  
1094 70µg/mL. Twenty-four hours or six days post-treatment, concentrations of intracellular unspliced HIV-  
1095 1 RNA or of extracellular HIV-1 RNA was determined, respectively in cells and in cell culture  
1096 supernatants. Total HIV-1 DNA was expressed as HIV-1 DNA copies *per* million CD8<sup>+</sup>-depleted  
1097 PBMCs. ‘I’ indicates that the value is below the limit of detection. ‘X’ indicates that the condition was  
1098 not tested. Of note, individual X20 was excluded from extracellular quantification due to high level of  
1099 extracellular HIV-1 RNA in mock-treated condition at 24h post-stimulation.



1100 **Figure 1**

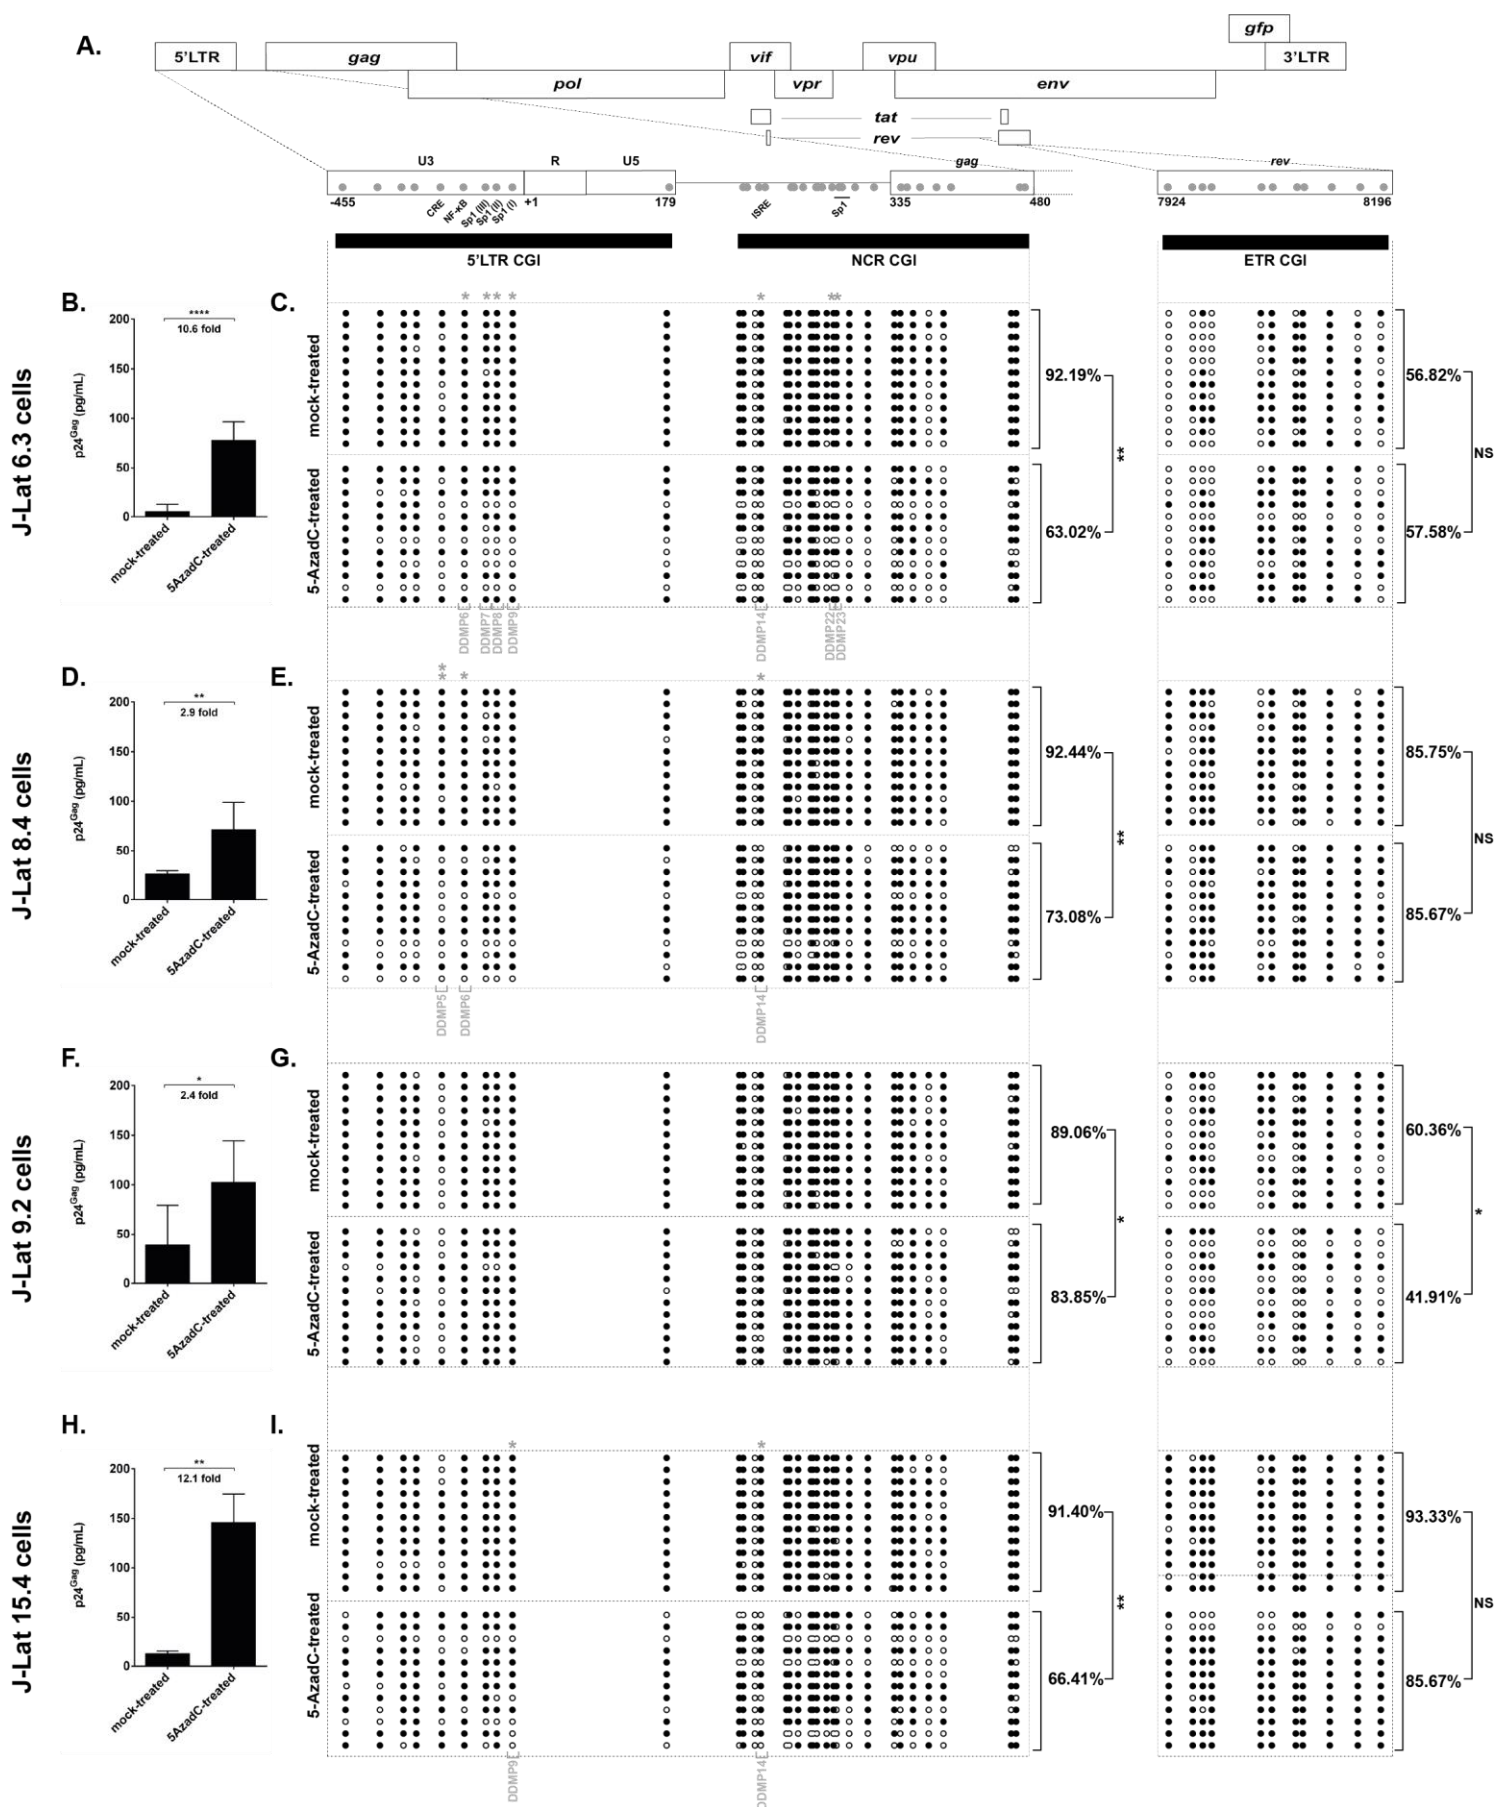

1101 **Figure 2**

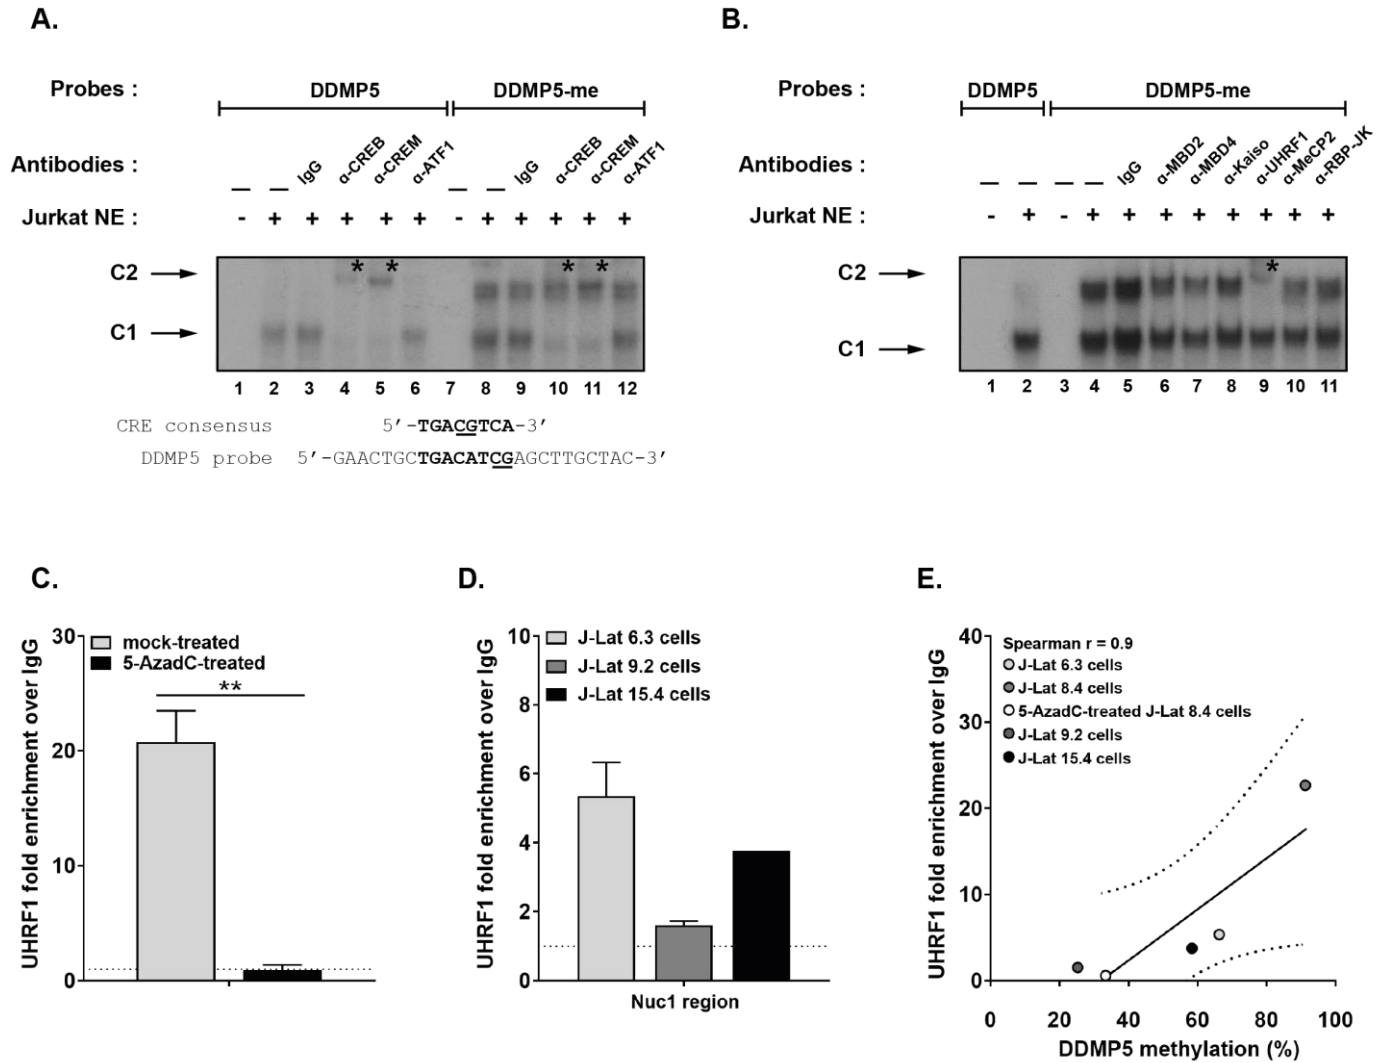

1102 **Figure 3**

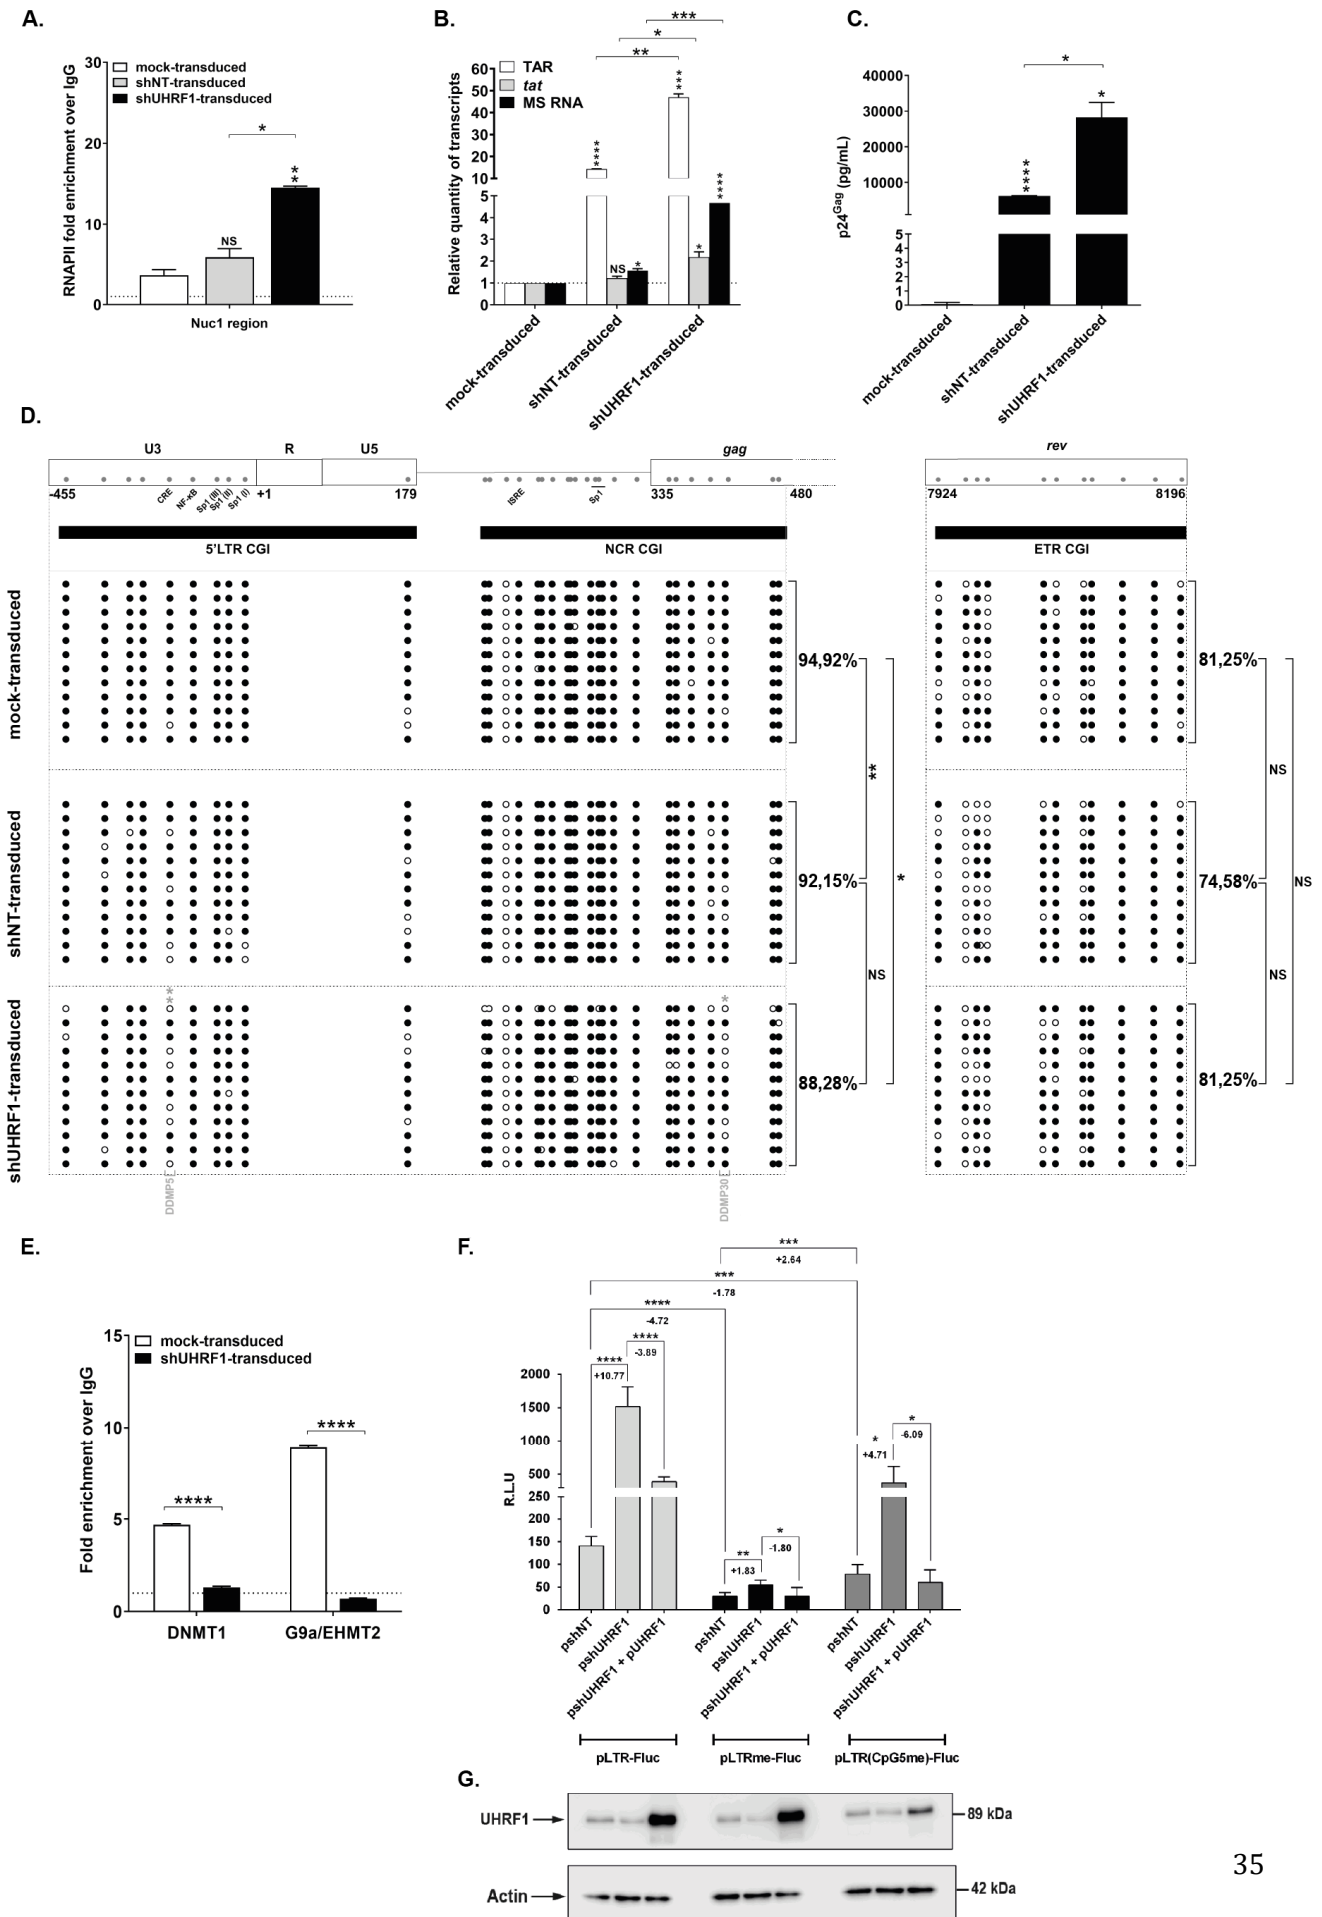

1103 **Figure 4**

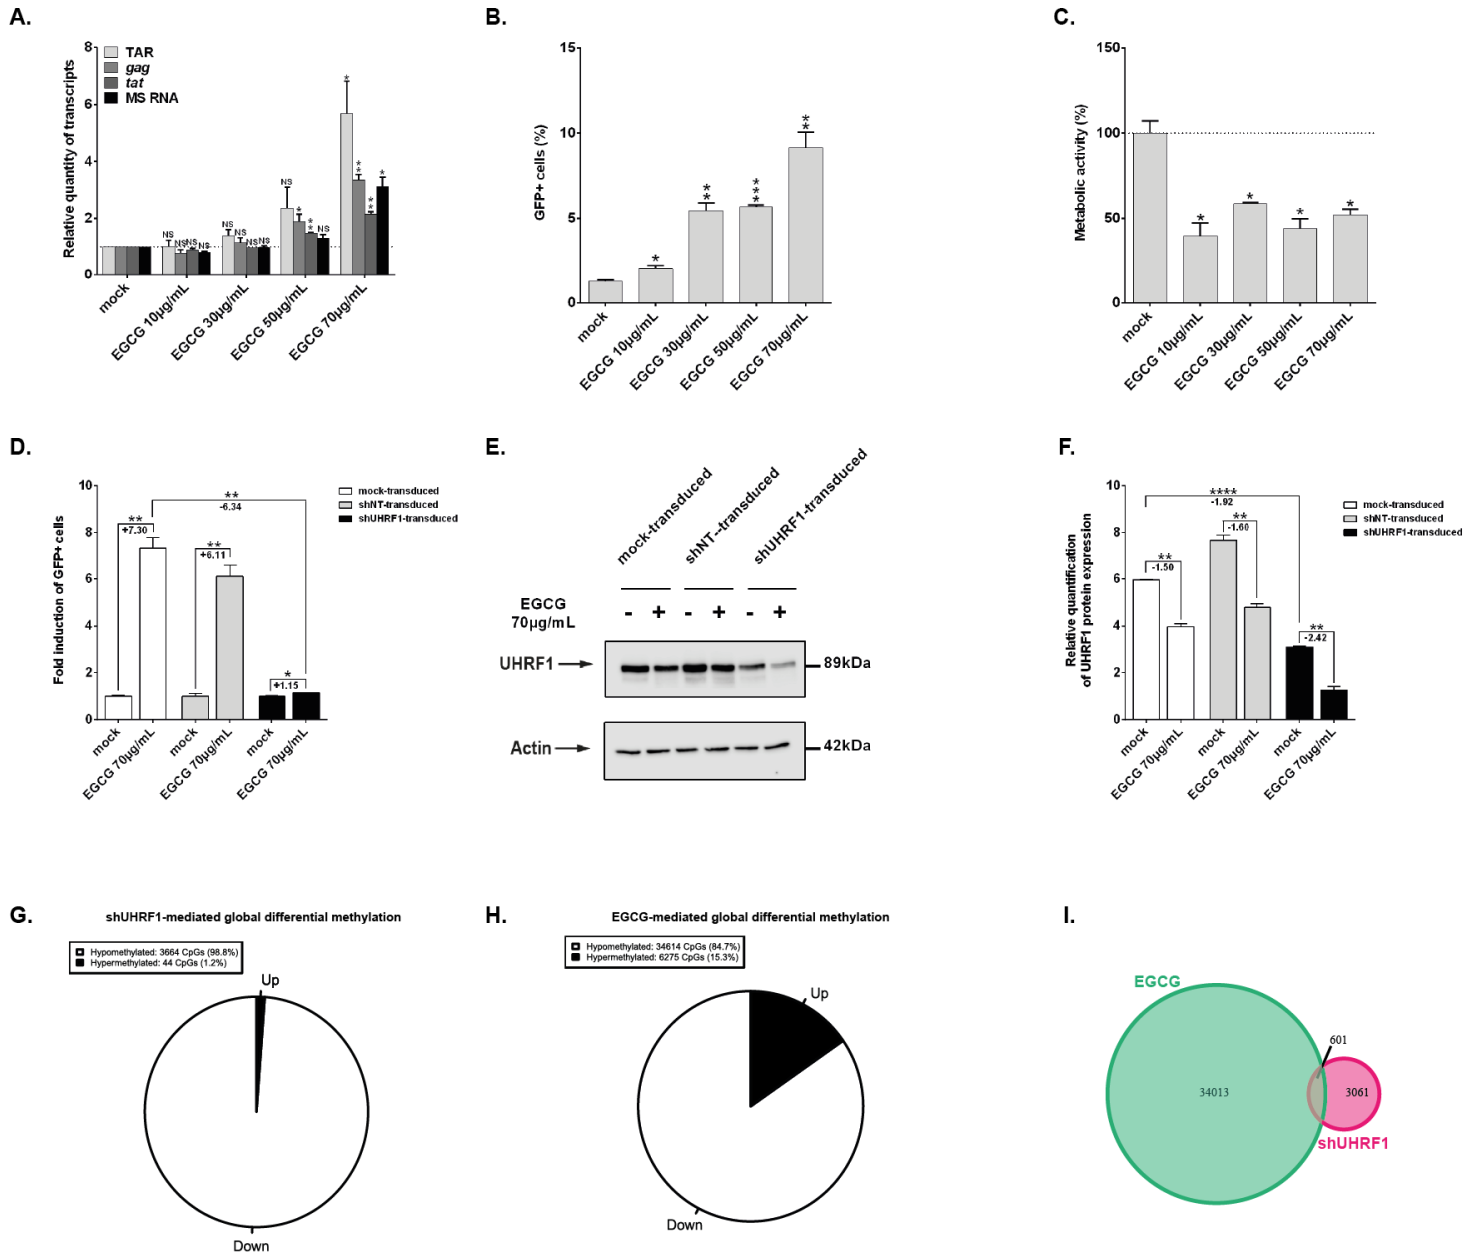

Figure 5

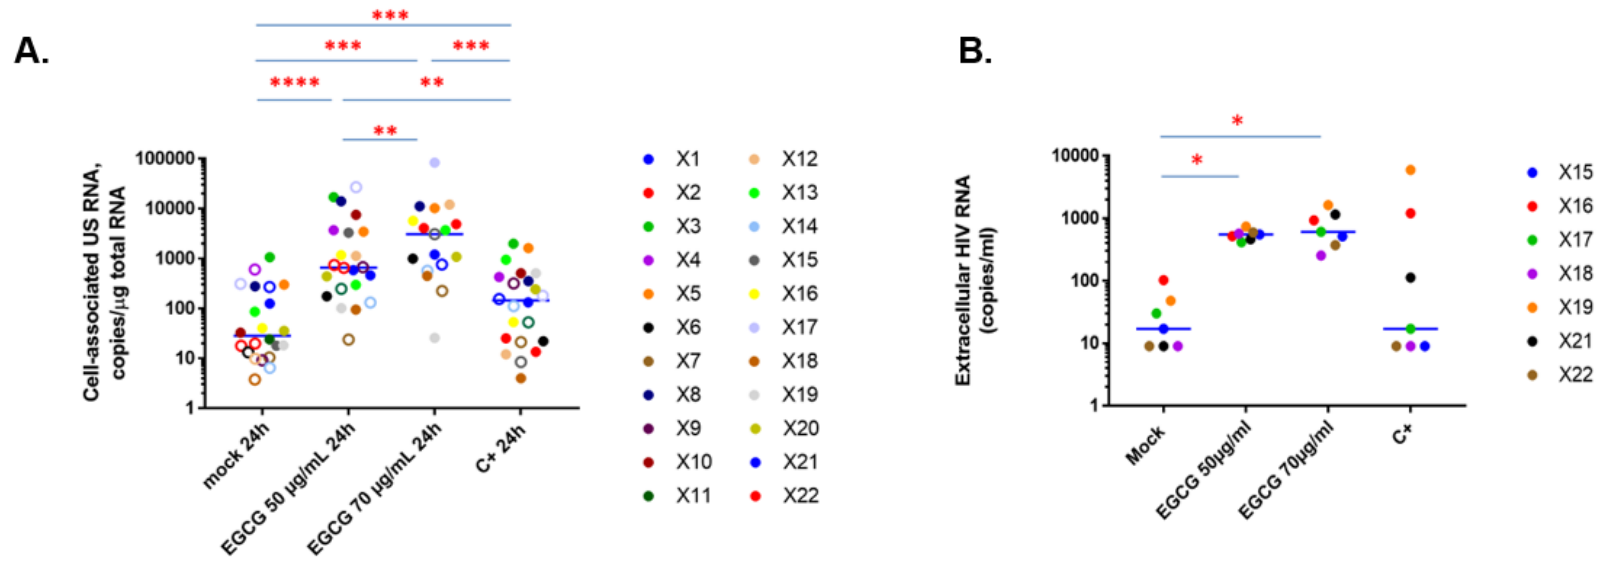

**Table 1**

| Cell line        | CpG position <sup>a</sup> | Probability of 5-AzadC-induced demethylation | p-value <sup>b</sup> | Statistical-significance  | Location <sup>c</sup>                             | DDMP <sup>d</sup> |
|------------------|---------------------------|----------------------------------------------|----------------------|---------------------------|---------------------------------------------------|-------------------|
| J-Lat 6.3 cells  | -[158,159]                | 0,33                                         | 0,046                | *                         | N/A                                               | DDMP3             |
|                  | <b>-[96, 97]</b>          | <b>0,33</b>                                  | <b>0,0466</b>        | *                         | <b>NF-κB site</b>                                 | <b>DDMP6</b>      |
|                  | <b>-[74,75]</b>           | <b>0,45</b>                                  | <b>0,32</b>          | *                         | <b>Sp1 site III</b>                               | <b>DDMP7</b>      |
|                  | <b>-[63,64]</b>           | <b>0,42</b>                                  | <b>0,0186</b>        | *                         | <b>Sp1 site II</b>                                | <b>DDMP8</b>      |
|                  | <b>-[47, 48]</b>          | <b>0,42</b>                                  | <b>0,0186</b>        | *                         | <b>Sp1 site I</b>                                 | <b>DDMP9</b>      |
|                  | + [109, 110]              | 0,42                                         | 0,0186               | *                         | U5 interacting with ψ                             | DDMP10            |
|                  | + [183, 184]              | 0,42                                         | 0,0186               | *                         | PBS                                               | DDMP11            |
|                  | + [186, 187]              | 0,33                                         | 0,0466               | *                         | PBS                                               | DDMP12            |
|                  | <b>+ [205, 206]</b>       | <b>0,42</b>                                  | <b>0,0186</b>        | *                         | <b>Interferon-Stimulated Response Element</b>     | <b>DDMP14</b>     |
|                  | + [243, 244]              | 0,33                                         | 0,0466               | *                         | Zinc Knuckles in p7Gag binding to SL1             | DDMP17            |
|                  | + [261, 262]              | 0,42                                         | 0,0186               | *                         | SL2 of ψ                                          | DDMP20            |
|                  | <b>+ [278, 279]</b>       | <b>0,42</b>                                  | <b>0,0186</b>        | *                         | <b>Sp1 site of HSIV</b>                           | <b>DDMP22</b>     |
|                  | <b>+ [282, 283]</b>       | <b>0,33</b>                                  | <b>0,0466</b>        | *                         | <b>Sp1 site of HSIV</b>                           | <b>DDMP23</b>     |
|                  | + [295, 296]              | 0,33                                         | 0,0466               | *                         | SL2 of ψ                                          | DDMP24            |
|                  | + [314, 315]              | 0,42                                         | 0,0186               | *                         | SL3 of ψ                                          | DDMP25            |
|                  | + [341, 342]              | 0,5                                          | 0,0069               | **                        | SL4 of ψ                                          | DDMP26            |
|                  | + [360, 361]              | 0,33                                         | 0,0466               | *                         | Coding sequence of p17Gag                         | DDMP28            |
| + [390, 391]     | 0,6                       | 0,0167                                       | *                    | Coding sequence of p17Gag | DDMP30                                            |                   |
| J-Lat 8.4 cells  | <b>-[119, 120]</b>        | <b>0,64</b>                                  | <b>0,0045</b>        | <b>**</b>                 | <b>CRE site</b>                                   | <b>DDMP5</b>      |
|                  | <b>-[96, 97]</b>          | <b>0,33</b>                                  | <b>0,0466</b>        | *                         | <b>NF-κB site</b>                                 | <b>DDMP6</b>      |
|                  | + [183, 184]              | 0,33                                         | 0,0466               | *                         | N/A                                               | DDMP11            |
|                  | <b>+ [205, 206]</b>       | <b>0,33</b>                                  | <b>0,0466</b>        | *                         | <b>Interferon-Stimulated Response Element</b>     | <b>DDMP14</b>     |
|                  | + [231, 232]              | 0,45                                         | 0,0320               | *                         | N/A                                               | DDMP15            |
|                  | + [360, 361]              | 0,33                                         | 0,0466               | *                         | Coding sequence of p17Gag                         | DDMP28            |
| J-Lat 15.4 cells | -[217, 218]               | 0,33                                         | 0,0466               | *                         | N/A                                               | DDMP1             |
|                  | <b>-[47, 48]</b>          | <b>0,42</b>                                  | <b>0,0186</b>        | *                         | <b>Sp1 site</b>                                   | <b>DDMP9</b>      |
|                  | + [109, 110]              | 0,33                                         | 0,0466               | *                         | U5 interacting with ψ                             | DDMP10            |
|                  | <b>+ [205, 206]</b>       | <b>0,42</b>                                  | <b>0,0186</b>        | *                         | <b>Interferon-Stimulated Response Element</b>     | <b>DDMP14</b>     |
|                  | + [231, 232]              | 0,42                                         | 0,0186               | *                         | N/A                                               | DDMP15            |
|                  | + [234, 235]              | 0,33                                         | 0,0466               | *                         | SL1 of ψ                                          | DDMP16            |
|                  | + [243, 244]              | 0,33                                         | 0,0466               | *                         | Zinc Knuckles in p7 <sup>Gag</sup> binding to SL1 | DDMP17            |
|                  | + [295, 296]              | 0,50                                         | 0,0069               | *                         | SL2 of ψ                                          | DDMP24            |
|                  | + [314, 315]              | 0,33                                         | 0,0466               | *                         | SL3 of ψ                                          | DDMP25            |
|                  | + [341, 342]              | 0,42                                         | 0,0186               | *                         | SL4 of ψ                                          | DDMP26            |
|                  | + [347, 348]              | 0,33                                         | 0,0466               | *                         | SL4 of ψ                                          | DDMP27            |
|                  | + [360, 361]              | 0,36                                         | 0,0129               | *                         | Coding sequence of p17Gag                         | DDMP28            |



**Figure S1**

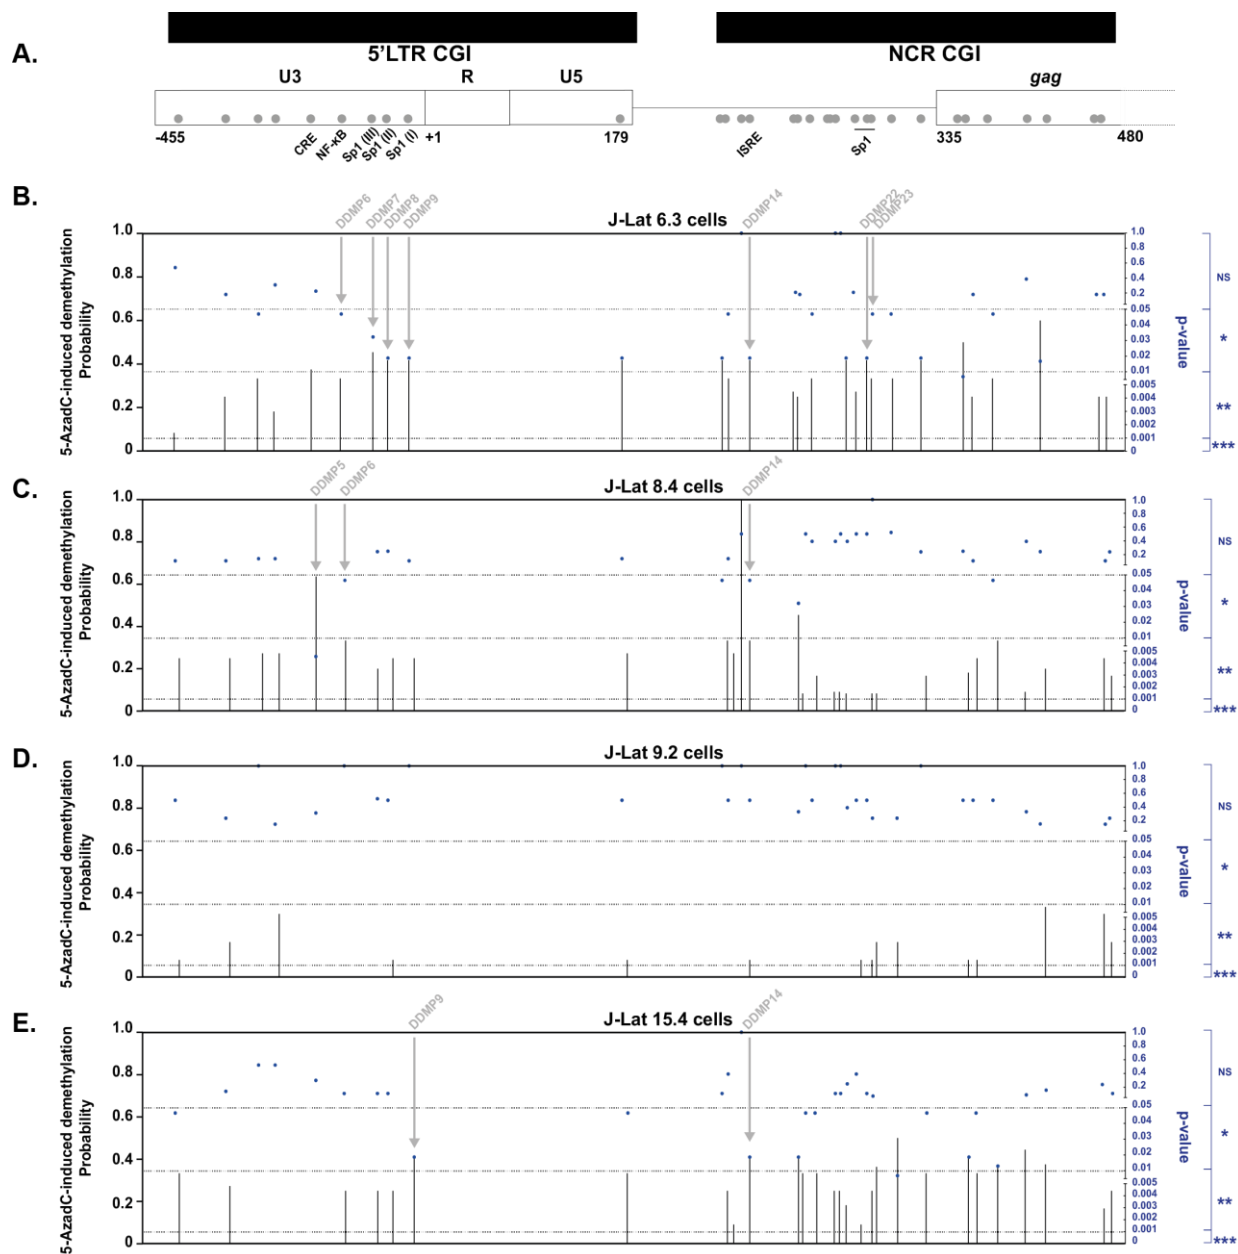

Figure S2

**A.**

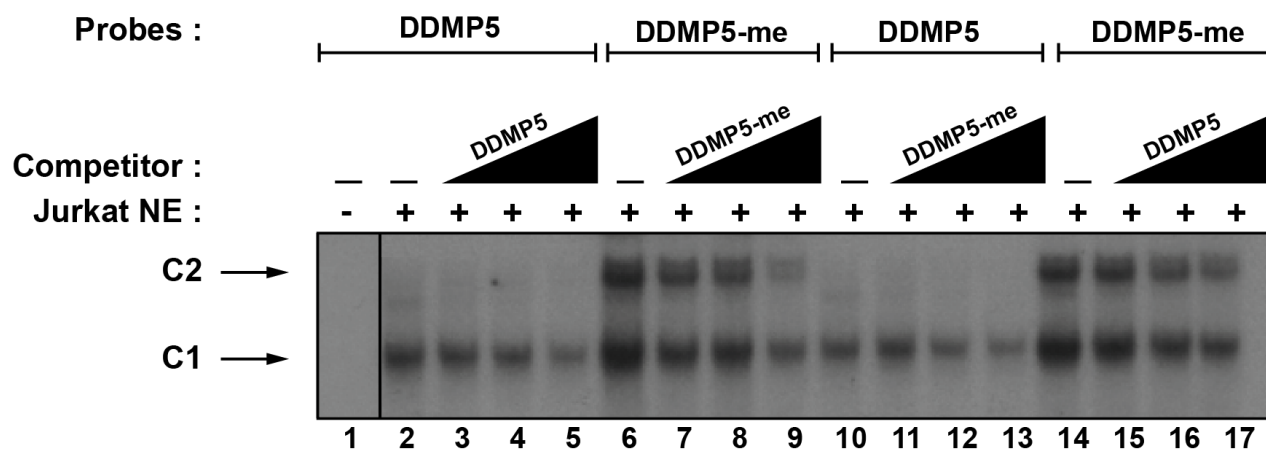

**B.**

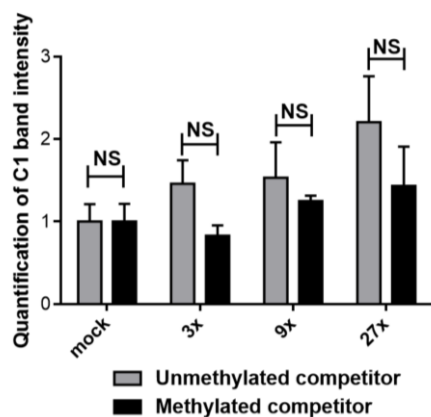

**C.**

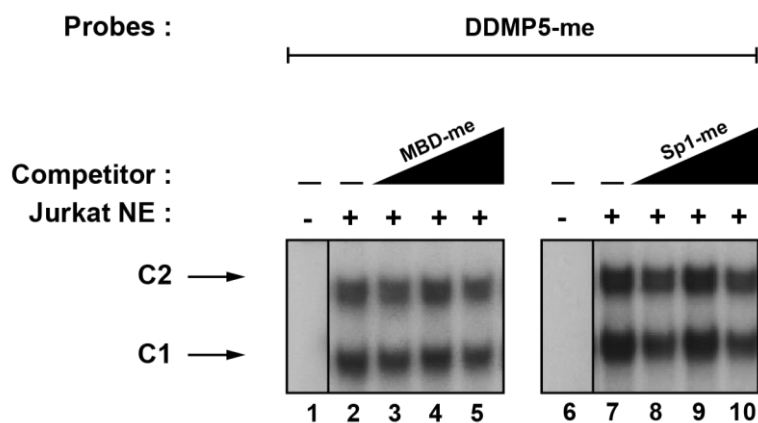

**Figure S3**

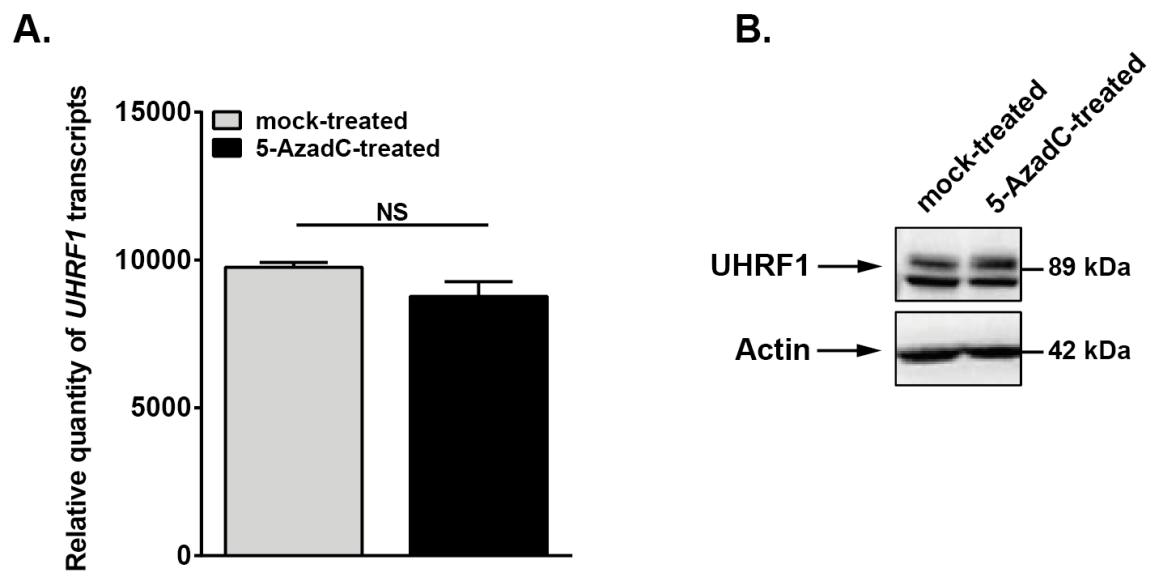

**Figure S4**

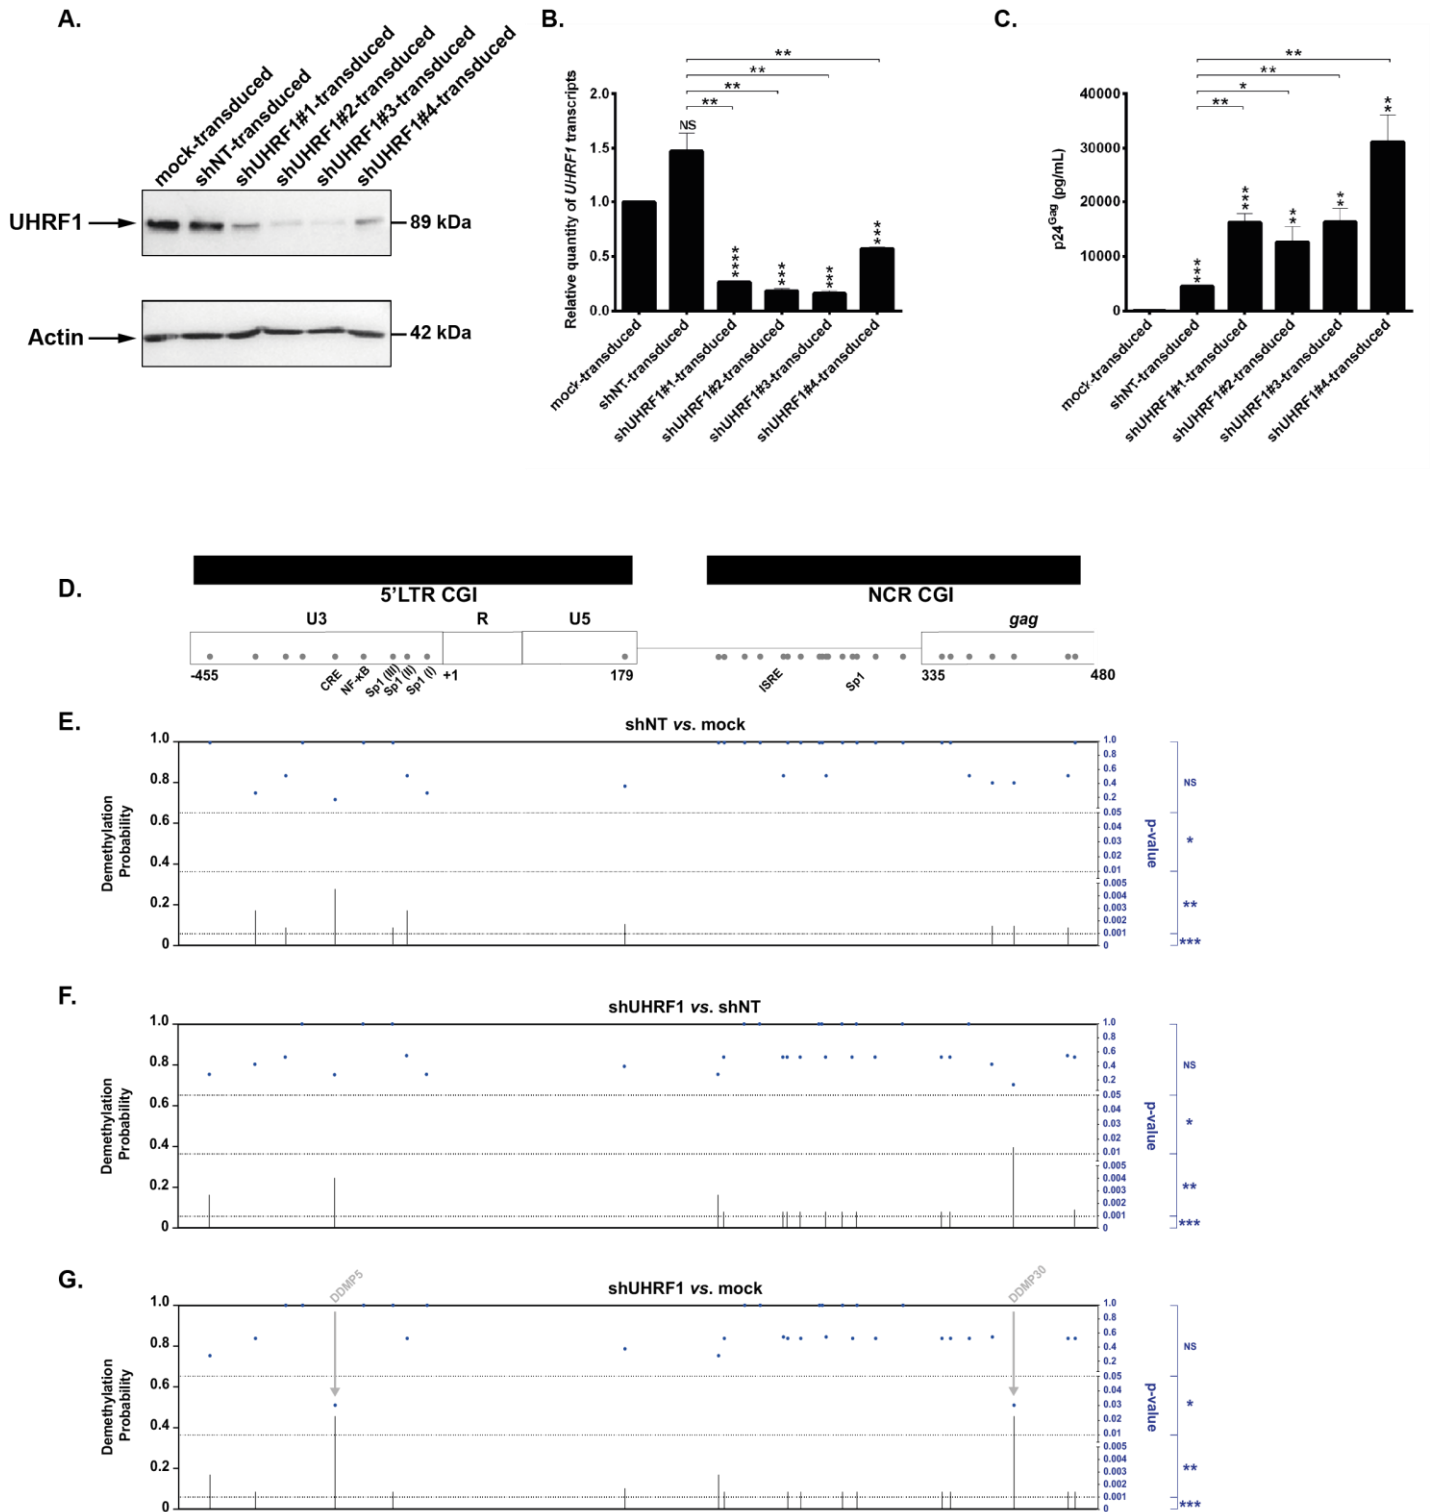

**Figure S5**

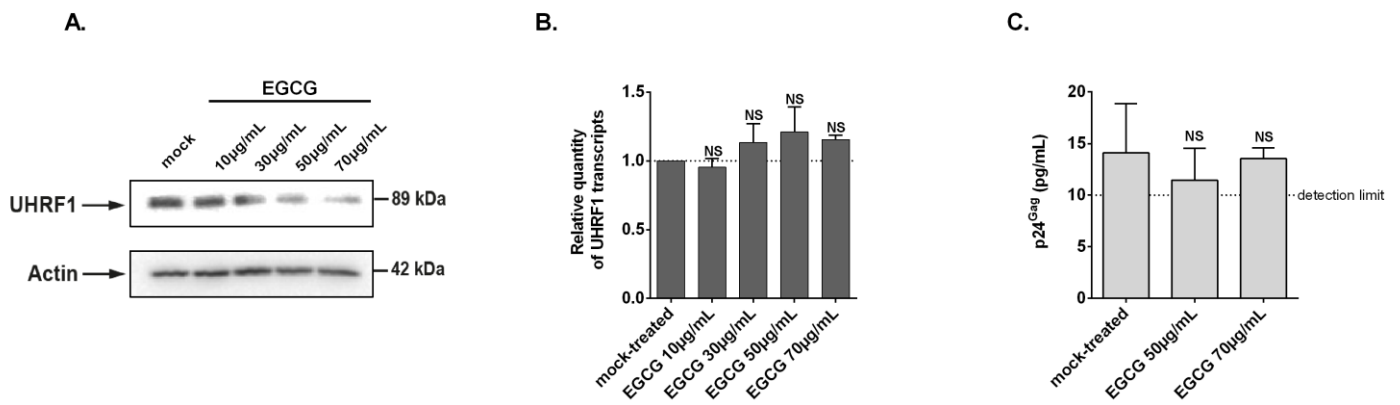

**Figure S6**

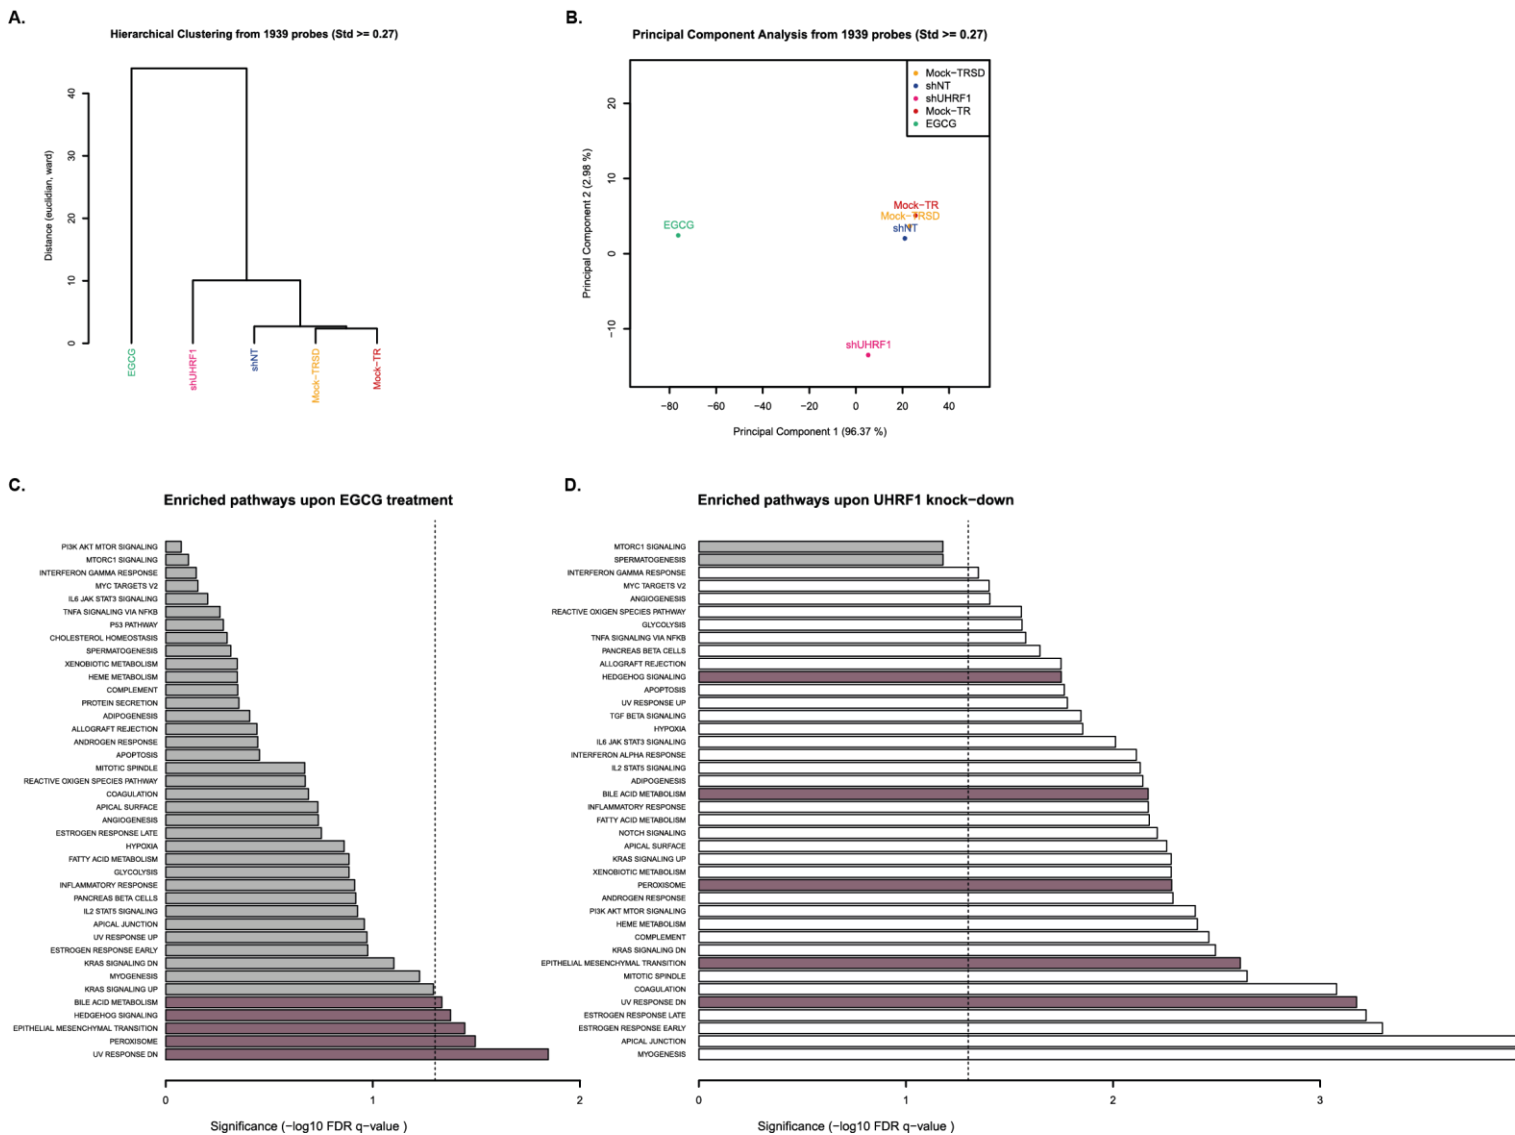



**Figure S7**

**A.**

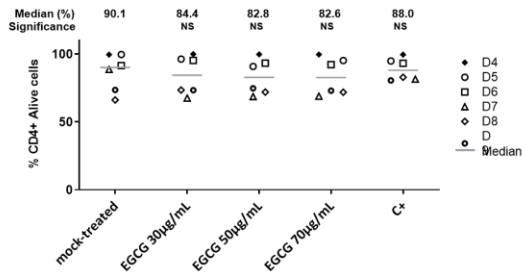

**B.**

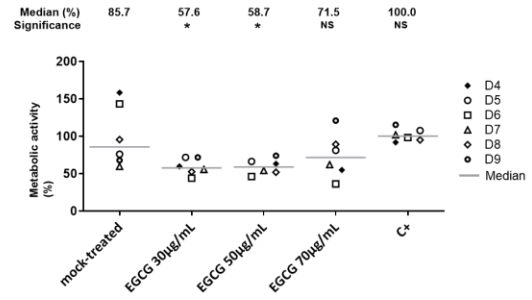

**C.**

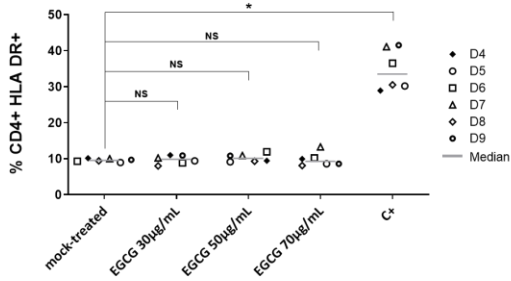

**D.**

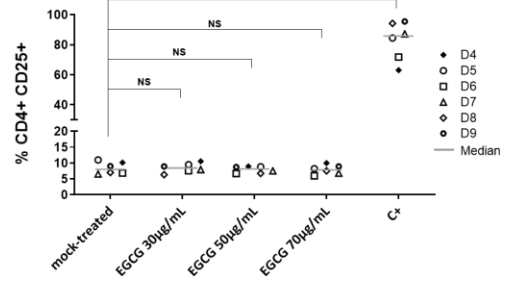

**E.**

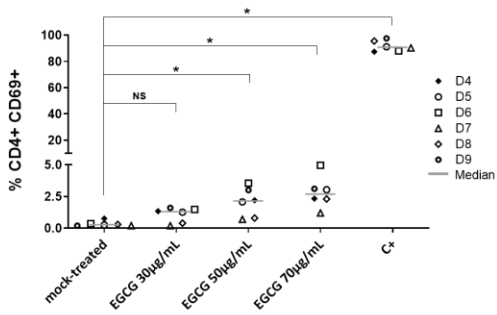

**F.**

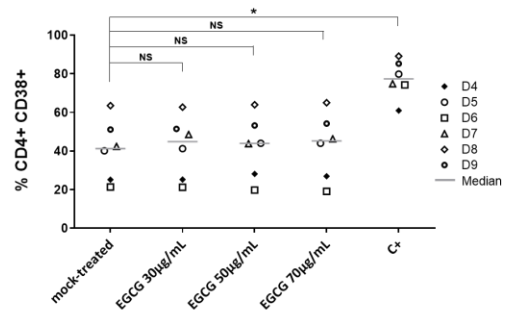

**G.**

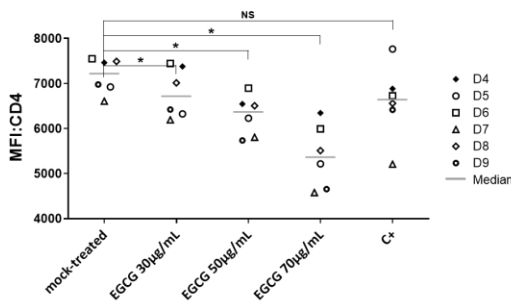

Figure S8

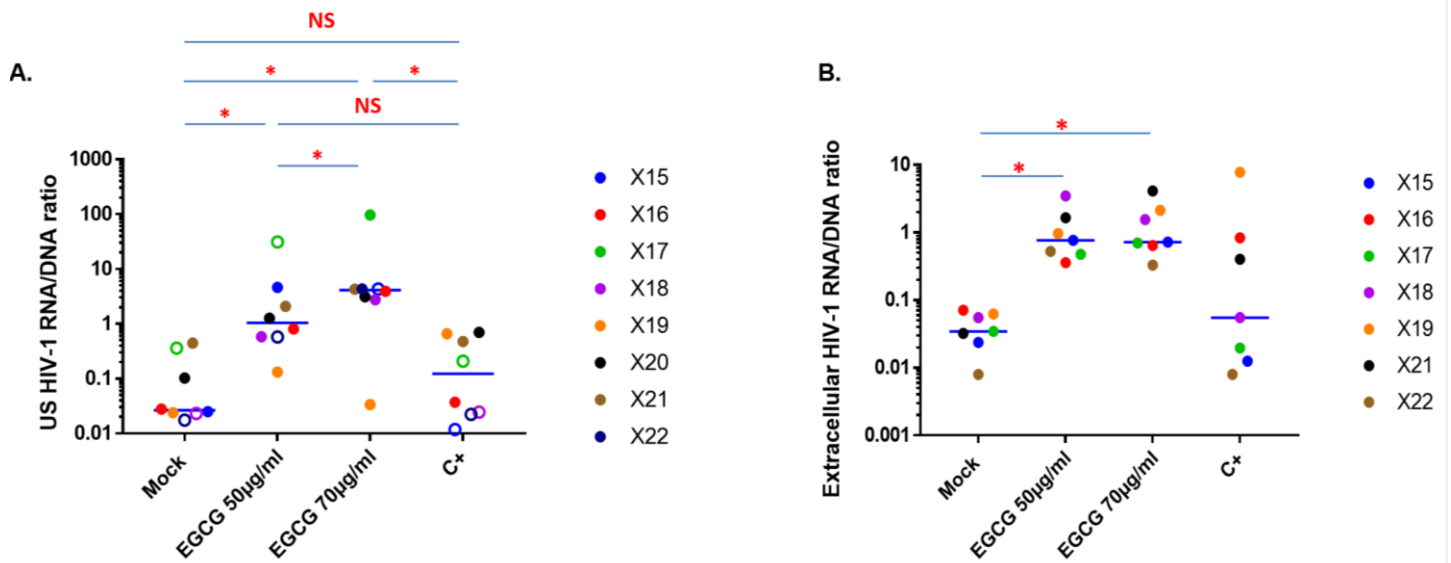

**C.**

| Patient | HIV Intracellular US RNA/DNA |              |              |      | HIV extracellular RNA/DNA |              |              |      |
|---------|------------------------------|--------------|--------------|------|---------------------------|--------------|--------------|------|
|         | Mock                         | EGCG 50µg/mL | EGCG 70µg/mL | C+   | Mock                      | EGCG 50µg/mL | EGCG 70µg/mL | C+   |
| X15     | 0,02                         | 4,60         | 4,32         | 0,01 | 0,02                      | 0,77         | 0,72         | 0,01 |
| X16     | 0,03                         | 0,81         | 3,94         | 0,04 | 0,07                      | 0,36         | 0,64         | 0,83 |
| X17     | 0,36                         | 31,03        | 96,67        | 0,21 | 0,03                      | 0,48         | 0,70         | 0,02 |
| X18     | 0,02                         | 0,58         | 2,75         | 0,02 | 0,06                      | 3,49         | 1,56         | 0,06 |
| X19     | 0,02                         | 0,13         | 0,03         | 0,66 | 0,06                      | 0,96         | 2,13         | 7,80 |
| X20     | 0,10                         | 1,27         | 3,11         | 0,70 | 10,40                     | 1,54         | 4,59         | 0,55 |
| X21     | 0,45                         | 2,09         | 4,29         | 0,48 | 0,03                      | 1,65         | 4,11         | 0,40 |
| X22     | 0,02                         | 0,57         | 4,32         | 0,02 | 0,01                      | 0,53         | 0,33         | 0,01 |

Figure S9

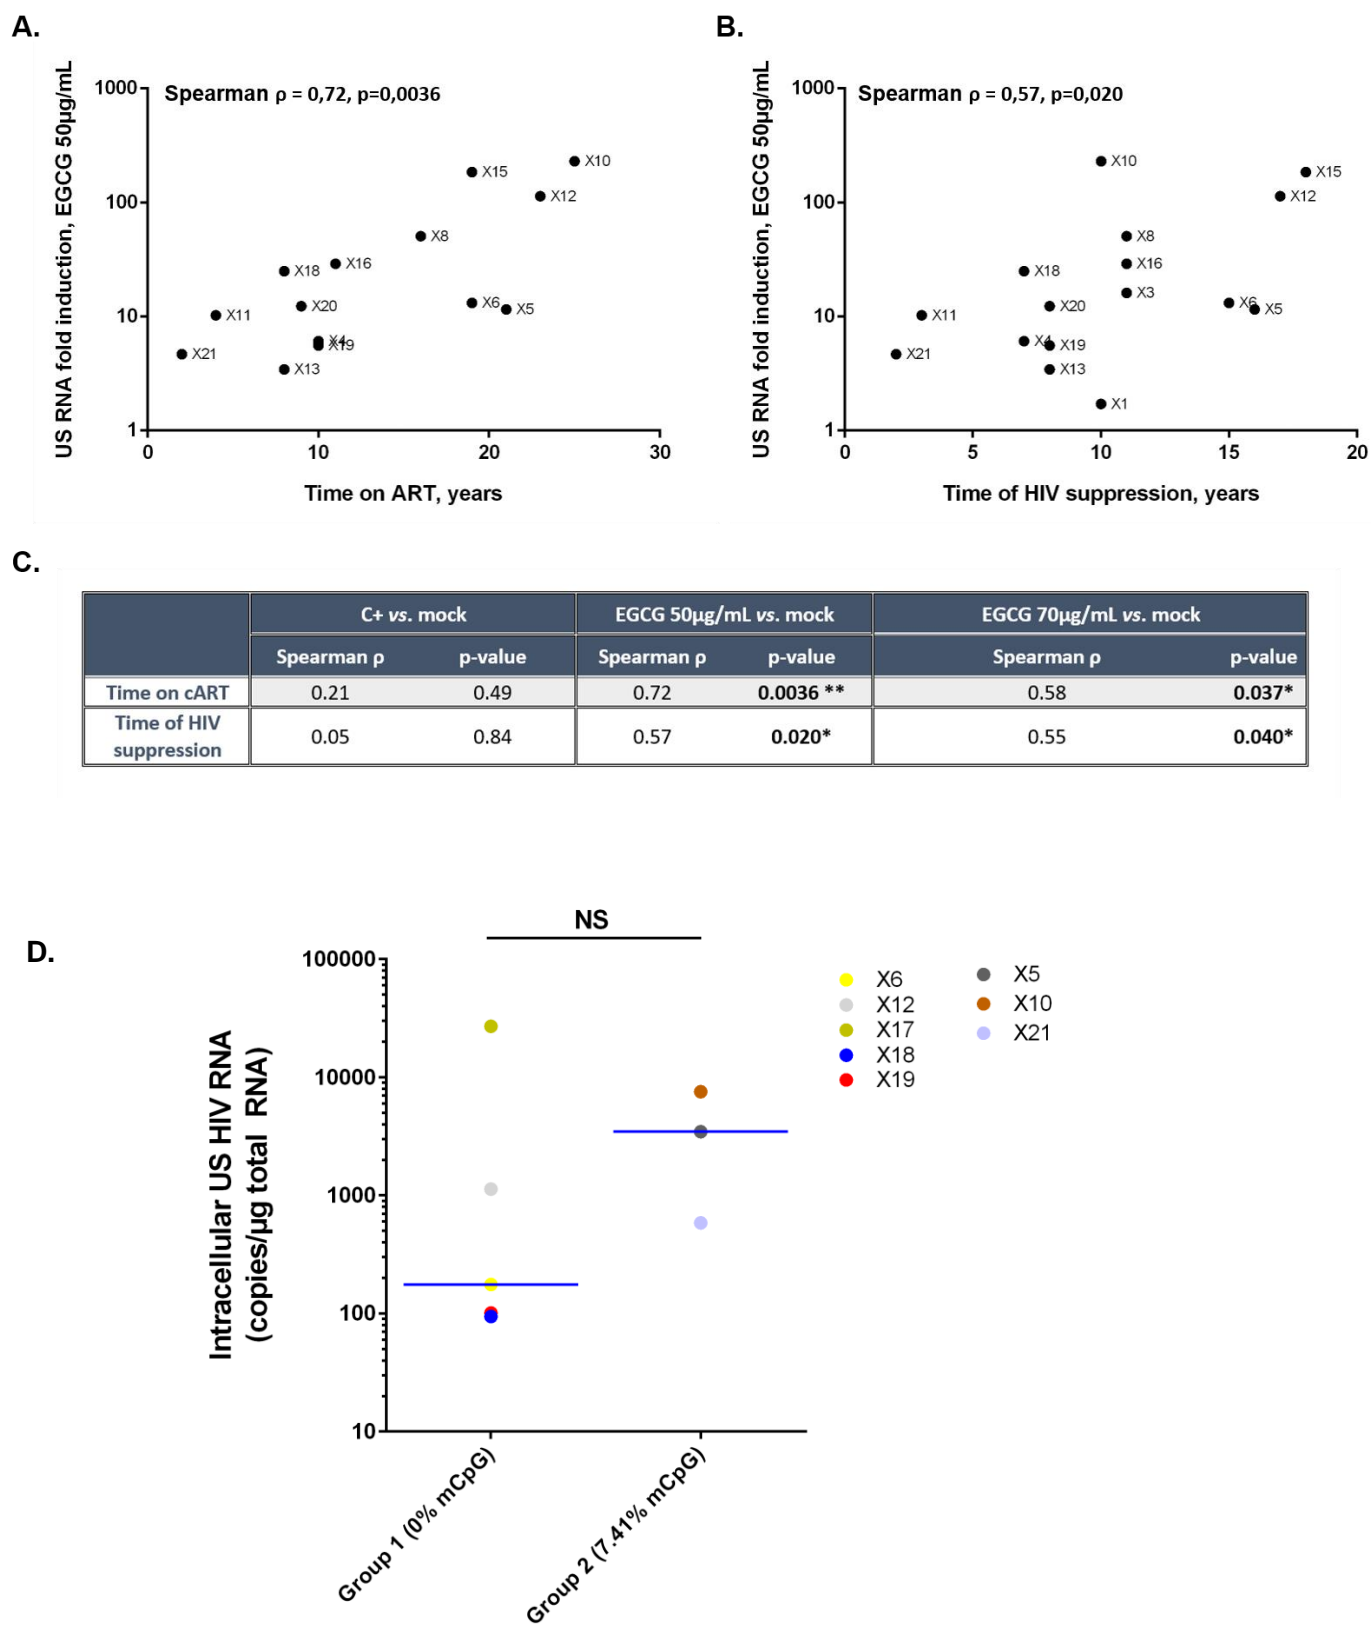

Table S1

A.

| Cell type                        | Patient | Year of birth | Year of HIV diagnostic | HIV subtype | Race          | CD4+ Nadir (cells/ $\mu$ L) | Year of 1st treatment | Year of undetectable status (<50 copies/ml) | Year of blood uptake | CD4+ T count at last point | Last treatment | Year of last treatment administration |
|----------------------------------|---------|---------------|------------------------|-------------|---------------|-----------------------------|-----------------------|---------------------------------------------|----------------------|----------------------------|----------------|---------------------------------------|
| CD8 <sup>+</sup> -depleted PBMCs | X1      | 1952          | ?                      | ?           | Caucasian     | 315                         | ?                     | 2007                                        | 2017                 | 636                        | RTV DRV        | 2012                                  |
|                                  | X2      | 1957          | ?                      | ?           | Caucasian     | 765                         | ?                     | 2015                                        | 2017                 | 1221                       | STB            | 2015                                  |
|                                  | X3      | 1955          | ?                      | ?           | Caucasian     | 237                         | ?                     | 2006                                        | 2017                 | 896                        | ART            | 2010                                  |
|                                  | X4      | 1978          | 2007                   | B           | Caucasian     | 151                         | 2007                  | 2010                                        | 2017                 | 561                        | GEN            | 2013                                  |
|                                  | X5      | 1964          | 1986                   | ?           | Caucasian     | 45                          | 1996                  | 2001                                        | 2017                 | 598                        | KVX NPV        | 2002                                  |
|                                  | X6      | 1959          | 1998                   | B           | Caucasian     | 215                         | 1998                  | 2002                                        | 2017                 | 892                        | ART            | 2009                                  |
|                                  | X7      | 1963          | 2014                   | C           | Afro-European | 548                         | 2015                  | 2015                                        | 2017                 | 684                        | TRI            | 2015                                  |
|                                  | X8      | 1939          | 2001                   | ?           | Caucasian     | 267                         | 2001                  | 2006                                        | 2017                 | 1142                       | KVX EFV        | 2006                                  |
|                                  | X9      | 1966          | 1994                   | ?           | African       | 384                         | 1997                  | 1999                                        | 2017                 | 871                        | RTV ATV EFV    | 2011                                  |
|                                  | X10     | 1957          | 1992                   | ?           | Caucasian     | 538                         | 1992                  | 2007                                        | 2017                 | 598                        | TRU DTG        | 2016                                  |
|                                  | X11     | 1982          | 2013                   | B           | Caucasian     | 379                         | 2013                  | 2014                                        | 2017                 | 688                        | RPV DTG        | 2015                                  |
|                                  | X12     | 1939          | 1994                   | ?           | Caucasian     | 140                         | 1994                  | 2000                                        | 2017                 | 650                        | KVX NPV        | 2015                                  |
|                                  | X13     | 1962          | 1995                   | ?           | African       | 286                         | 2009                  | 2009                                        | 2017                 | 1304                       | GENVOYA        | 2016                                  |
|                                  | X14     | 1962          | ?                      | ?           | Caucasian     | 1011                        | ?                     | 2015                                        | 2017                 | 1045                       | KVX RTV ATV    | 2009                                  |
|                                  | X15     | 1968          | 1996                   | ?           | African       | 225                         | 1998                  | 1999                                        | 2017                 | 875                        | STB            | 2014                                  |
|                                  | X16     | 1969          | 2006                   | ?           | Caucasian     | 241                         | 2006                  | 2006                                        | 2017                 | 893                        | KVX NVP        | 2014                                  |
|                                  | X17     | 1965          | 1996                   | ?           | African       | 280                         | 1998                  | 1998                                        | 2017                 | 688                        | EVP            | 2017                                  |
|                                  | X18     | 1960          | 2008                   | ?           | Caucasian     | 307                         | 2009                  | 2010                                        | 2017                 | 809                        | TRU EFV        | 2009                                  |
|                                  | X19     | 1949          | 2007                   | ?           | African       | 474                         | 2007                  | 2009                                        | 2017                 | 574                        | KVX RTV DRV    | 2015                                  |
|                                  | X20     | 1949          | 2008                   | ?           | African       | 357                         | 2008                  | 2009                                        | 2017                 | 606                        | KVX NVP        | 2014                                  |
|                                  | X21     | 1979          | 2015                   | B           | Maghrebian    | 412                         | 2015                  | 2015                                        | 2017                 | 963                        | GEN            | 2017                                  |
|                                  | X22     | 1943          | 1996                   | ?           | Caucasian     | 260                         | 1997                  | 1999                                        | 2017                 | 782                        | EVP            | 2015                                  |

B.

| Patient | Total HIV-1 DNA (copies/10 <sup>6</sup> PBMCs) | Log Total HIV-1 DNA (copies/10 <sup>6</sup> PBMCs) | Intracellular US HIV RNA |              |              |      |                    |              |              |         | Extracellular HIV RNA |              |              |      |                    |              |              |       |
|---------|------------------------------------------------|----------------------------------------------------|--------------------------|--------------|--------------|------|--------------------|--------------|--------------|---------|-----------------------|--------------|--------------|------|--------------------|--------------|--------------|-------|
|         |                                                |                                                    | 24h stimulation          |              |              |      | 6 days stimulation |              |              |         | 24h stimulation       |              |              |      | 6 days stimulation |              |              |       |
|         |                                                |                                                    | Mock                     | EGCG 50µg/mL | EGCG 70µg/mL | C+   | Mock               | EGCG 50µg/mL | EGCG 70µg/mL | C+      | Mock                  | EGCG 50µg/mL | EGCG 70µg/mL | C+   | Mock               | EGCG 50µg/mL | EGCG 70µg/mL | C+    |
| X1      | 280                                            | 2.45                                               | 269                      | 460          | 760          | 155  | X                  | X            | X            | X       | X                     | X            | X            | X    | X                  | X            | X            | X     |
| X2      | 653                                            | 2.82                                               | 17.9                     | 744          | 4070         | 13.5 | X                  | X            | X            | X       | X                     | X            | X            | X    | X                  | X            | X            | X     |
| X3      | 2560                                           | 3.41                                               | 1060                     | 17100        | X            | 1990 | X                  | X            | X            | X       | X                     | X            | X            | X    | X                  | X            | X            | X     |
| X4      | 823                                            | 2.92                                               | 607                      | 3690         | X            | 428  | X                  | X            | X            | X       | X                     | X            | X            | X    | X                  | X            | X            | X     |
| X5      | 1517                                           | 3.18                                               | 299                      | 3460         | 10200        | 1620 | X                  | X            | X            | X       | X                     | X            | X            | X    | X                  | X            | X            | X     |
| X6      | 740                                            | 2.87                                               | 13.3                     | 176          | 995          | 22.1 | X                  | X            | X            | X       | X                     | X            | X            | X    | X                  | X            | X            | X     |
| X7      | 240                                            | 2.38                                               | 10.4                     | 23.9         | 225          | 21.2 | X                  | X            | X            | X       | X                     | X            | X            | X    | X                  | X            | X            | X     |
| X8      | 943                                            | 2.97                                               | 277                      | 14000        | 11200        | 353  | X                  | X            | X            | X       | X                     | X            | X            | X    | X                  | X            | X            | X     |
| X9      | 1650                                           | 3.22                                               | 9.11                     | 671          | X            | 319  | X                  | X            | X            | X       | X                     | X            | X            | X    | X                  | X            | X            | X     |
| X10     | 680                                            | 2.83                                               | 32.8                     | 7550         | X            | 508  | X                  | X            | X            | X       | X                     | X            | X            | X    | X                  | X            | X            | X     |
| X11     | 1210                                           | 3.08                                               | 24                       | 247          | X            | 52.9 | X                  | X            | X            | X       | X                     | X            | X            | X    | X                  | X            | X            | X     |
| X12     | 970                                            | 2.99                                               | 9.89                     | 1130         | 12000        | 12   | X                  | X            | X            | X       | X                     | X            | X            | X    | X                  | X            | X            | X     |
| X13     | 4363                                           | 3.64                                               | 86                       | 296          | 3690         | 946  | X                  | X            | X            | X       | X                     | X            | X            | X    | X                  | X            | X            | X     |
| X14     | >13                                            | >1.11                                              | 6.46                     | 132          | 571          | 112  | X                  | X            | X            | X       | X                     | X            | X            | X    | X                  | X            | X            | X     |
| X15     | 717                                            | 2.86                                               | 17.9                     | 3300         | 3100         | 8.48 | 6.75               | X            | X            | 957,55  | 1                     | 551          | 516          | 1    | 1                  | 176          | 244          | 24163 |
| X16     | 1447                                           | 3.16                                               | 40.2                     | 1170         | 5700         | 53.5 | 40,05              | X            | X            | 1185,47 | 103                   | 520          | 931          | 1205 | 1                  | 446          | 727          | 6438  |
| X17     | 870                                            | 2.94                                               | 312                      | 27000        | 84100        | 181  | X                  | X            | X            | X       | 1                     | 416          | 610          | 17   | 92                 | 183          | 71           | 7074  |
| X18     | 163                                            | 2.21                                               | 3.77                     | 94.5         | 448          | 4.01 | 5,29               | 493,26       | X            | 24,91   | 1                     | 569          | 254          | 1    | 1                  | 82           | 92           | 515   |
| X19     | 767                                            | 2.88                                               | 18.2                     | 101          | 25.8         | 507  | 160,95             | 1            | X            | 508,90  | 1                     | 740          | 1634         | 5979 | 411                | 658          | X            | 7484  |
| X20     | 347                                            | 2.54                                               | 35.7                     | 441          | 1080         | 242  | 43,81              | 521,57       | X            | 403,54  | 3608                  | 534          | 1592         | 191  | 80                 | 4127         | 750          | 1253  |
| X21     | 280                                            | 2.45                                               | 125                      | 585          | 1200         | 133  | 424,61             | X            | X            | 440,75  | 1                     | 462          | 1151         | 113  | 105                | 644          | 328          | 11449 |
| X22     | 1133                                           | 3.05                                               | 19.8                     | 651          | 4900         | 25.3 | 23,64              | X            | X            | 438,97  | 1                     | 596          | 373          | 1    | 1                  | 217          | 1            | 2677  |

|                                                                    |      |      |      |      |      |      |   |     |    |     |     |      |    |     |     |     |
|--------------------------------------------------------------------|------|------|------|------|------|------|---|-----|----|-----|-----|------|----|-----|-----|-----|
| # of activated patient cell cultures (over the limit of detection) | 11   | 15   | 15   | 13   | 6    | 2    | X | 7   | 2  | 8   | 8   | 5    | 4  | 8   | 6   | 8   |
| # of analyzed patient cell cultures                                | 22   | 22   | 17   | 22   | 7    | 3    | X | 7   | 8  | 8   | 8   | 8    | 8  | 8   | 6   | 8   |
| % of activated patient cell cultures                               | 73.3 | 68.2 | 88.2 | 59.1 | 85.7 | 66.7 | X | 100 | 25 | 100 | 100 | 62.5 | 50 | 100 | 100 | 100 |
